# Supplementary material
Source: MDPI journal article supplement (https://www.mdpi.com/2073-4352/12/8/1139)
Supplement: s1 [file s1]

# First-Principles Calculations of the Structural, Electronic, Optical, and Mechanical Properties of 21 Pyrophosphate Crystals

Sahib Hasan<sup>1,2</sup>, Paul Rulis<sup>1</sup>, and Wai-Yim Ching<sup>1</sup>

1. Department of Sciences, College of Basic Education, Al Muthanna University, Samawah 66001, Iraq

2. Department of Physics and Astronomy, University of Missouri-Kansas City, Kansas City, MO 64110, USA

\* Correspondence: chingw@umkc.edu

## 1. Optical properties

We use OLCAO method to calculate the optical properties of crystalline materials based on the theory of inter-band optical absorptions within the random phase approximation. According to this approach, the optical conductivity is given by:

$$\sigma_1(\hbar\omega) = \frac{2\pi e\hbar^2}{3m^2\omega\Omega} \sum_{n,l} |\langle n|\vec{p}|l\rangle|^2 f_l [1 - f_n] \delta(E_n - E_l - \hbar\omega) \quad (1)$$

$f_l$  is the Fermi-Dirac function of the occupied band state  $l$  and  $\delta$  function makes sure that the energy is conserved in the transition process between occupied state and unoccupied state with energy  $E_l$  and  $E_n$  respectively.  $\Omega$  is the volume of the unit cell.

Assuming that there is no intra-band transitions for the materials with an energy gap in their band structure, so that the optical properties can be described by the complex dielectric function which is related to the  $\sigma_1(\hbar\omega)$  by:

$$\varepsilon_2(\omega) = 4\pi \frac{\sigma_1(\omega)}{\omega} \quad (2)$$

By transforming the summation over the unit cell in the equation (3) to an integral over the BZ in  $\mathbf{k}$  space,  $\varepsilon_2(\omega)$  can be given by:

$$\varepsilon_2(\hbar\omega) = \frac{e^2}{\pi m\omega^2} \int d\mathbf{k}^3 \sum_{n,l} |\langle \Psi_n(\vec{k}, \vec{r}) | -i\hbar \vec{\nabla} | \Psi_l(\vec{k}, \vec{r}) \rangle|^2 f_l(\vec{k}) [1 - f_n(\vec{k})] \delta(E_n(\vec{k}) - E_l(\vec{k}) - \hbar\omega) \quad (3)$$

The real part of the dielectric function can be derived from  $\varepsilon_2$  by using Kramers-Kronig relation:

$$\varepsilon_1(\hbar\omega) = 1 + \frac{2}{\pi} P \int_0^\infty \frac{s\varepsilon_2(\hbar s)}{s^2 - \omega^2} ds \quad (4)$$

In OLCAO method, the momentum matrices in the Eqs (2) and (4) for the optical transitions can be easily calculated as sums of two –center integrals between GTOs[1].

## 2. Mechanical properties

Ab initio calculation method within DFT for the mechanical properties is very powerful method these days. In this section, and to calculate the mechanical properties, we followed the method of the Hongzhi Yao et al. work[2]. In this work, a scheme has been applied to calculate the elastic constants of crystals. Starting with the simple Hook's famous law that can relate the stress components  $\sigma_i$  with the strain components  $\varepsilon_j$  by relation:

$$\sigma_i = \sum_{j=1}^6 C_{ij} \varepsilon_j \quad (5)$$

$C_{ij}$  is the elastic constants of the crystals. From knowing the elastic constants, we calculate other mechanical properties like compliance tensor  $S_{ij}$ , Young's modulus (E), Bulk modulus (K), Shear modulus (G), and Poisson's ratio ( $\eta$ ). Here, the Voigt – Reuss –Hill (VRH)[3,4] approximation has been used to derive the above mechanical properties. According to this approximation, the upper and lower bounds for the structural parameters, like bulk and shear modulus are respectively given by:

$$K_V = \frac{(C_{11}+C_{22}+C_{33})}{9} + \frac{2(C_{12}+C_{13}+C_{23})}{9} \quad (6)$$

$$K_R = \frac{1}{(S_{11}+S_{22}+S_{33})+2(S_{12}+S_{13}+S_{23})} \quad (7)$$

$$G_V = \frac{(C_{11}+C_{22}+C_{33}-C_{12}-C_{13}-C_{23})}{15} + \frac{(C_{44}+C_{55}+C_{66})}{5} \quad (8)$$

$$G_R = \frac{15}{4(S_{11}+S_{22}+S_{33})-4(S_{12}+S_{13}+S_{23})+3(S_{44}+S_{55}+S_{66})} \quad (9)$$

So, the average values of the mechanical properties are given by:

$$K = \frac{(K_V+K_R)}{2} \quad (10)$$

$$G = \frac{(G_V+G_R)}{2} \quad (11)$$

$$E = \frac{9KG}{(3K+G)} \quad (12)$$

$$\eta = \frac{(3K-2G)}{2(3K+G)} \quad (13)$$

### 3. The Supplementary Tables

**Table S1.** Young's modulus (E), bulk modulus (K), shear modulus (G), Poisson's ratio ( $\eta$ ), Pugh's ratio (G/K), and Vicker's hardness( $H_V$ ) for the 21 crystals.

| #  | Crystal                               | E(GPa) | K(GPa) | G(GPa) | $\eta$ | G/K   | $H_V$ (GPa) |
|----|---------------------------------------|--------|--------|--------|--------|-------|-------------|
| 1  | K <sub>2</sub> Zn-1                   | 28.712 | 21.999 | 11.194 | 0.283  | 0.509 | 2.361       |
| 2  | K <sub>2</sub> Zn-2                   | 41.432 | 28.241 | 16.500 | 0.256  | 0.584 | 3.632       |
| 3  | K <sub>2</sub> Cu-3                   | 32.303 | 26.329 | 12.467 | 0.296  | 0.474 | 2.349       |
| 4  | K <sub>2</sub> Cu-4                   | 42.251 | 31.018 | 16.595 | 0.273  | 0.535 | 3.301       |
| 5  | K <sub>2</sub> Ni-5                   | 20.853 | 16.749 | 8.067  | 0.293  | 0.482 | 1.759       |
| 6  | K <sub>2</sub> Ni-6                   | 37.787 | 30.673 | 14.593 | 0.295  | 0.476 | 2.639       |
| 7  | K <sub>2</sub> Co-7                   | 37.497 | 25.825 | 14.903 | 0.258  | 0.577 | 3.334       |
| 8  | K <sub>2</sub> Mg-8                   | 42.945 | 27.731 | 17.290 | 0.242  | 0.623 | 4.041       |
| 9  | Rb <sub>2</sub> Zn-9                  | 38.921 | 27.716 | 15.372 | 0.266  | 0.555 | 3.260       |
| 10 | Rb <sub>2</sub> Mg-10                 | 40.606 | 27.239 | 16.222 | 0.252  | 0.596 | 3.673       |
| 11 | Rb <sub>2</sub> Co-11                 | 37.848 | 28.985 | 14.757 | 0.283  | 0.509 | 2.871       |
| 12 | (NH <sub>4</sub> ) <sub>2</sub> Zn-12 | 49.931 | 34.213 | 19.865 | 0.257  | 0.581 | 4.118       |
| 13 | (NH <sub>4</sub> ) <sub>2</sub> Mg-13 | 46.434 | 33.579 | 18.288 | 0.269  | 0.545 | 3.612       |
| 14 | (NH <sub>4</sub> ) <sub>2</sub> Ni-14 | 44.468 | 38.973 | 16.975 | 0.310  | 0.436 | 2.658       |
| 15 | (NH <sub>4</sub> ) <sub>2</sub> Co-15 | 45.794 | 37.910 | 17.631 | 0.299  | 0.465 | 2.938       |
| 16 | (NH <sub>4</sub> ) <sub>2</sub> Mn-16 | 47.698 | 35.165 | 18.721 | 0.274  | 0.532 | 3.572       |
| 17 | Tl <sub>2</sub> Zn-17                 | 37.208 | 26.668 | 14.678 | 0.268  | 0.550 | 3.123       |
| 18 | Tl <sub>2</sub> Ni-18                 | 33.009 | 27.107 | 12.725 | 0.297  | 0.469 | 2.355       |
| 19 | Tl <sub>2</sub> Mg-19                 | 37.723 | 26.564 | 14.930 | 0.263  | 0.562 | 3.240       |
| 20 | Tl <sub>2</sub> Mn-20                 | 40.013 | 27.919 | 15.864 | 0.261  | 0.568 | 3.423       |
| 21 | Tl <sub>2</sub> Co-21                 | 36.767 | 27.260 | 14.416 | 0.275  | 0.529 | 2.950       |

**Table S2.** The calculated elastic constants  $C_{ij}$  (GPa) for the 21 crystals.

| #  | Crystal                               | $C_{11}$ | $C_{12}$ | $C_{13}$ | $C_{21}$ | $C_{22}$ | $C_{23}$ | $C_{31}$ | $C_{32}$ | $C_{33}$ | $C_{44}$ | $C_{55}$ | $C_{66}$ |
|----|---------------------------------------|----------|----------|----------|----------|----------|----------|----------|----------|----------|----------|----------|----------|
| 1  | K <sub>2</sub> Zn-1                   | 27.25    | 11.57    | 17.63    | 11.57    | 38.22    | 10.98    | 17.63    | 10.97    | 64.11    | 10.48    | 10.23    | 8.71     |
| 2  | K <sub>2</sub> Zn-2                   | 77.63    | 8.92     | 5.02     | 8.92     | 60.02    | 20.78    | 5.02     | 20.78    | 61.86    | 16.05    | 10.42    | 12.10    |
| 3  | K <sub>2</sub> Cu-3                   | 44.29    | 14.10    | 27.81    | 14.10    | 63.34    | 8.89     | 27.81    | 8.89     | 38.34    | 5.67     | 21.41    | 14.65    |
| 4  | K <sub>2</sub> Cu-4                   | 94.55    | 6.73     | 6.75     | 6.73     | 61.88    | 21.90    | 6.75     | 21.90    | 64.28    | 14.73    | 10.17    | 9.55     |
| 5  | K <sub>2</sub> Ni-5                   | 36.94    | 10.64    | 16.31    | 10.64    | 31.92    | 11.56    | 16.31    | 11.56    | 28.00    | 7.84     | 7.15     | 8.17     |
| 6  | K <sub>2</sub> Ni-6                   | 98.74    | 2.88     | 12.45    | 2.88     | 55.23    | 21.68    | 12.45    | 21.68    | 67.31    | 13.45    | 8.34     | 6.65     |
| 7  | K <sub>2</sub> Co-7                   | 69.07    | 13.84    | 8.69     | 13.84    | 50.12    | 21.03    | 8.69     | 21.03    | 52.49    | 14.68    | 14.46    | 14.26    |
| 8  | K <sub>2</sub> Mg-8                   | 77.01    | 9.06     | 4.66     | 9.06     | 59.20    | 19.48    | 4.66     | 19.48    | 61.66    | 17.74    | 10.71    | 13.99    |
| 9  | Rb <sub>2</sub> Zn-9                  | 77.62    | 7.40     | 7.63     | 7.40     | 55.60    | 19.74    | 7.63     | 19.74    | 59.36    | 14.19    | 9.88     | 10.69    |
| 10 | Rb <sub>2</sub> Mg-10                 | 75.76    | 8.01     | 6.93     | 8.01     | 56.44    | 18.59    | 6.93     | 18.59    | 58.64    | 16.28    | 10.50    | 11.78    |
| 11 | Rb <sub>2</sub> Co-11                 | 85.87    | 8.85     | 8.14     | 8.85     | 54.96    | 19.92    | 8.14     | 19.92    | 59.52    | 16.53    | 8.67     | 7.94     |
| 12 | (NH <sub>4</sub> ) <sub>2</sub> Zn-12 | 92.55    | 15.09    | 9.08     | 15.09    | 67.30    | 20.72    | 9.08     | 20.72    | 67.18    | 17.03    | 13.15    | 17.54    |
| 13 | (NH <sub>4</sub> ) <sub>2</sub> Mg-13 | 98.64    | 9.19     | 10.49    | 9.16     | 64.04    | 22.95    | 10.49    | 22.95    | 72.56    | 17.34    | 12.41    | 11.20    |
| 14 | (NH <sub>4</sub> ) <sub>2</sub> Ni-14 | 107.7    | 13.59    | 19.70    | 13.59    | 64.34    | 22.72    | 19.70    | 22.72    | 79.55    | 12.78    | 10.65    | 9.56     |
| 15 | (NH <sub>4</sub> ) <sub>2</sub> Co-15 | 112.1    | 13.68    | 17.54    | 13.68    | 65.27    | 22.26    | 17.54    | 22.26    | 70.66    | 13.36    | 12.43    | 10.27    |
| 16 | (NH <sub>4</sub> ) <sub>2</sub> Mn-16 | 105.6    | 13.09    | 11.51    | 13.09    | 63.56    | 24.21    | 11.51    | 24.21    | 70.34    | 18.20    | 12.40    | 12.51    |
| 17 | Tl <sub>2</sub> Zn-17                 | 73.80    | 7.57     | 7.62     | 7.57     | 56.59    | 20.00    | 7.62     | 20.00    | 59.24    | 12.78    | 10.60    | 9.90     |
| 18 | Tl <sub>2</sub> Ni-18                 | 79.66    | 8.99     | 8.83     | 8.99     | 56.12    | 19.95    | 8.83     | 19.95    | 60.88    | 12.93    | 8.20     | 6.54     |
| 19 | Tl <sub>2</sub> Mg-19                 | 69.38    | 8.78     | 8.41     | 8.78     | 60.09    | 19.57    | 8.41     | 19.57    | 56.91    | 16.68    | 10.52    | 9.61     |
| 20 | Tl <sub>2</sub> Mn-20                 | 81.01    | 7.28     | 8.44     | 7.28     | 55.47    | 20.59    | 8.44     | 20.59    | 61.28    | 15.53    | 11.75    | 9.98     |
| 21 | Tl <sub>2</sub> Co-21                 | 71.57    | 7.82     | 9.48     | 7.82     | 57.52    | 20.39    | 9.48     | 20.39    | 60.85    | 16.21    | 9.44     | 8.09     |

**Table S3.** The calculated elastic constants  $C_{ij}$  (GPa) for the crystals 2, 4, 6, and the crystals from 7 to 21.

| #  | Crystal                               | $C_{14}$ | $C_{15}$ | $C_{16}$ | $C_{24}$ | $C_{25}$ | $C_{26}$ | $C_{34}$ | $C_{35}$ | $C_{36}$ | $C_{41}$ | $C_{42}$ | $C_{43}$ |
|----|---------------------------------------|----------|----------|----------|----------|----------|----------|----------|----------|----------|----------|----------|----------|
| 2  | K <sub>2</sub> Zn-2                   | 0.550    | 1.546    | 6.645    | 5.696    | 1.292    | 4.759    | 5.892    | 6.985    | 1.973    | 0.550    | 5.696    | 5.892    |
| 4  | K <sub>2</sub> Cu-4                   | -1.335   | -3.959   | 6.998    | 3.931    | -0.035   | 2.128    | 1.987    | 1.589    | 2.227    | -1.335   | 3.931    | 1.987    |
| 6  | K <sub>2</sub> Ni-6                   | -4.120   | -5.780   | 4.561    | 0.866    | 0.499    | -0.465   | -1.983   | -1.825   | 1.705    | -4.110   | 0.866    | -1.983   |
| 7  | K <sub>2</sub> Co-7                   | 6.064    | 2.106    | 7.559    | -3.402   | 1.820    | 9.264    | -3.350   | 13.601   | 3.078    | 6.064    | -3.403   | -3.350   |
| 8  | K <sub>2</sub> Mg-8                   | 1.150    | 2.922    | 7.597    | 5.294    | 1.292    | 4.937    | 4.882    | 7.515    | 1.962    | 1.150    | 5.294    | 4.882    |
| 9  | Rb <sub>2</sub> Zn-9                  | -0.311   | 0.174    | 5.856    | 5.658    | 1.696    | 2.871    | 4.806    | 6.229    | 2.703    | -0.311   | 5.658    | 4.806    |
| 10 | Rb <sub>2</sub> Mg-10                 | 0.277    | 1.873    | 6.766    | 5.426    | 1.414    | 3.365    | 3.430    | 6.787    | 2.665    | 0.277    | 5.426    | 3.430    |
| 11 | Rb <sub>2</sub> Co-11                 | 1.767    | -2.140   | 3.554    | 3.558    | 1.480    | 2.605    | 3.130    | 4.991    | 1.619    | 1.767    | 3.558    | 3.130    |
| 12 | (NH <sub>4</sub> ) <sub>2</sub> Zn-12 | -3.754   | -3.681   | 1.661    | 4.574    | -2.231   | 2.183    | 9.928    | 1.488    | 1.647    | -3.754   | 4.574    | 9.928    |
| 13 | (NH <sub>4</sub> ) <sub>2</sub> Mg-13 | 0.664    | 0.233    | 5.678    | 6.198    | 0.814    | 6.701    | 4.589    | 6.545    | 2.757    | 0.664    | 6.198    | 4.589    |
| 14 | (NH <sub>4</sub> ) <sub>2</sub> Ni-14 | -0.587   | -2.088   | -0.607   | 0.798    | 1.722    | -2.803   | 0.886    | 1.063    | 0.422    | -0.587   | 0.798    | 0.886    |
| 15 | (NH <sub>4</sub> ) <sub>2</sub> Co-15 | -0.992   | -2.398   | 4.369    | 1.494    | 1.324    | 2.610    | 0.445    | 2.733    | 2.130    | -0.992   | 1.494    | 0.445    |
| 16 | (NH <sub>4</sub> ) <sub>2</sub> Mn-16 | 2.073    | 0.448    | 8.053    | 3.936    | 1.663    | 7.186    | 3.380    | 5.966    | 3.636    | 2.073    | 3.936    | 3.380    |
| 17 | Tl <sub>2</sub> Zn-17                 | 0.127    | 0.131    | 8.503    | 5.427    | 1.865    | 5.705    | 5.196    | 7.217    | 2.820    | 0.126    | 5.427    | 5.196    |
| 18 | Tl <sub>2</sub> Ni-18                 | 1.250    | -2.633   | 4.583    | 5.406    | 1.455    | 6.105    | 5.676    | 6.356    | 1.747    | 1.250    | 5.406    | 5.676    |
| 19 | Tl <sub>2</sub> Mg-19                 | 0.616    | 1.696    | 9.970    | 5.380    | 1.593    | 5.161    | 3.821    | 7.588    | 2.162    | 0.616    | 5.380    | 3.821    |
| 20 | Tl <sub>2</sub> Mn-20                 | 0.105    | 2.772    | 9.592    | 3.513    | 1.753    | 3.957    | 2.668    | 7.877    | 2.968    | 0.105    | 3.513    | 2.668    |
| 21 | Tl <sub>2</sub> Co-21                 | 0.894    | -0.866   | 5.797    | 4.335    | 1.586    | 6.103    | 3.350    | 6.700    | 2.342    | 0.894    | 4.335    | 3.360    |

**Table S4.** The calculated elastic constants  $C_{ij}$  (GPa) for the crystals 2, 4, 6, and the crystals from 7 to 21.

| #  | Crystal                               | $C_{45}$ | $C_{46}$ | $C_{51}$ | $C_{52}$ | $C_{53}$ | $C_{54}$ | $C_{56}$ | $C_{61}$ | $C_{62}$ | $C_{63}$ | $C_{64}$ | $C_{65}$ |
|----|---------------------------------------|----------|----------|----------|----------|----------|----------|----------|----------|----------|----------|----------|----------|
| 2  | K <sub>2</sub> Zn-2                   | 0.650    | 2.270    | 1.546    | 1.292    | 6.985    | 0.650    | 1.913    | 6.645    | 4.759    | 1.973    | 2.270    | 1.913    |
| 4  | K <sub>2</sub> Cu-4                   | -0.920   | 0.321    | -3.960   | -0.035   | 1.588    | -0.920   | 0.426    | 6.998    | 2.128    | 2.227    | 0.321    | 0.426    |
| 6  | K <sub>2</sub> Ni-6                   | -1.349   | -0.263   | -5.780   | 0.499    | -1.825   | -1.349   | 0.604    | 4.561    | -0.465   | 1.705    | -0.263   | 0.604    |
| 7  | K <sub>2</sub> Co-7                   | 2.950    | 1.247    | 2.106    | 1.820    | 13.601   | 2.950    | 1.445    | 7.559    | 9.264    | 3.078    | 1.247    | 1.445    |
| 8  | K <sub>2</sub> Mg-8                   | 1.140    | 2.649    | 2.922    | 1.292    | 7.515    | 1.140    | 2.522    | 7.597    | 4.937    | 1.962    | 2.649    | 2.522    |
| 9  | Rb <sub>2</sub> Zn-9                  | 1.044    | 2.498    | 0.174    | 1.696    | 6.229    | 1.044    | 1.291    | 5.856    | 2.871    | 2.703    | 2.498    | 1.291    |
| 10 | Rb <sub>2</sub> Mg-10                 | 1.082    | 2.533    | 1.873    | 1.414    | 6.787    | 1.082    | 1.734    | 6.766    | 3.365    | 2.665    | 2.533    | 1.732    |
| 11 | Rb <sub>2</sub> Co-11                 | 1.618    | 3.052    | -2.140   | 1.480    | 4.991    | 1.618    | -0.476   | 3.554    | 2.605    | 1.619    | 3.052    | -0.476   |
| 12 | (NH <sub>4</sub> ) <sub>2</sub> Zn-12 | -0.383   | -0.690   | -3.681   | -2.231   | 1.488    | -0.383   | -1.722   | 1.661    | 2.183    | 1.647    | -0.690   | -1.722   |
| 13 | (NH <sub>4</sub> ) <sub>2</sub> Mg-13 | 0.411    | 2.853    | 0.233    | 0.814    | 6.545    | 0.411    | 1.475    | 5.678    | 6.701    | 2.757    | 2.853    | 1.475    |
| 14 | (NH <sub>4</sub> ) <sub>2</sub> Ni-14 | -1.099   | 0.464    | -2.088   | 1.721    | 1.063    | -1.099   | 0.272    | -0.607   | -2.803   | 0.421    | 0.464    | 0.272    |
| 15 | (NH <sub>4</sub> ) <sub>2</sub> Co-15 | -0.346   | 1.761    | -2.398   | 1.324    | 2.733    | -0.346   | 0.868    | 4.369    | 2.610    | 2.130    | 1.761    | 0.868    |
| 16 | (NH <sub>4</sub> ) <sub>2</sub> Mn-16 | 1.126    | 2.903    | 0.448    | 1.663    | 5.966    | 1.126    | 2.076    | 8.053    | 7.188    | 3.636    | 2.903    | 2.076    |
| 17 | Tl <sub>2</sub> Zn-17                 | 0.775    | 2.423    | 0.131    | 1.865    | 7.217    | 0.775    | 1.232    | 8.503    | 5.705    | 2.820    | 2.423    | 1.232    |
| 18 | Tl <sub>2</sub> Ni-18                 | 0.989    | 2.390    | -2.633   | 1.455    | 6.356    | 0.989    | -2.108   | 4.583    | 6.105    | 1.747    | 2.390    | -2.108   |
| 19 | Tl <sub>2</sub> Mg-19                 | 1.283    | 2.772    | 1.696    | 1.593    | 7.588    | 1.283    | 1.629    | 9.970    | 5.161    | 2.162    | 2.772    | 1.629    |
| 20 | Tl <sub>2</sub> Mn-20                 | 1.112    | 2.245    | 2.772    | 1.753    | 7.877    | 1.112    | 1.784    | 9.592    | 3.957    | 2.968    | 2.245    | 1.784    |
| 21 | Tl <sub>2</sub> Co-21                 | 0.948    | 2.122    | -0.866   | 1.586    | 6.700    | 0.948    | -0.989   | 5.797    | 6.103    | 2.342    | 2.122    | -0.989   |



**Table S5.** The calculated bulk and shear modulus' Voigt and Reuss estimates ( $K_V$ ,  $K_R$ ,  $G_V$ ,  $G_R$ ), the universal anisotropic index ( $A^U$ ), and the percentage of anisotropy in the compression and shear for the 21 crystals ( $A_{comp}$ ,  $A_{shear}$ ).

| #  | Crystal                               | $K_V$ (GPa) | $K_R$ (GPa) | $G_V$ (GPa) | $G_R$ (GPa) | $A^U$ | $A_{comp}$ | $A_{shear}$ |
|----|---------------------------------------|-------------|-------------|-------------|-------------|-------|------------|-------------|
| 1  | K <sub>2</sub> Zn-1                   | 23.325      | 20.674      | 11.843      | 10.545      | 0.744 | 0.060      | 0.058       |
| 2  | K <sub>2</sub> Zn-2                   | 29.885      | 26.909      | 18.702      | 14.299      | 1.650 | 0.052      | 0.133       |
| 3  | K <sub>2</sub> Cu-3                   | 27.509      | 26.247      | 14.690      | 10.245      | 2.218 | 0.024      | 0.178       |
| 4  | K <sub>2</sub> Cu-4                   | 32.385      | 30.555      | 19.245      | 13.946      | 1.960 | 0.029      | 0.160       |
| 5  | K <sub>2</sub> Ni-5                   | 19.320      | 14.412      | 8.520       | 7.614       | 0.936 | 0.146      | 0.056       |
| 6  | K <sub>2</sub> Ni-6                   | 32.812      | 30.615      | 17.973      | 11.213      | 3.086 | 0.035      | 0.232       |
| 7  | K <sub>2</sub> Co-7                   | 28.754      | 22.980      | 17.221      | 12.586      | 2.090 | 0.112      | 0.155       |
| 8  | K <sub>2</sub> Mg-8                   | 29.363      | 26.335      | 19.467      | 15.114      | 1.555 | 0.054      | 0.126       |
| 9  | Rb <sub>2</sub> Zn-9                  | 29.125      | 26.720      | 17.473      | 13.271      | 1.673 | 0.043      | 0.137       |
| 10 | Rb <sub>2</sub> Mg-10                 | 28.654      | 26.080      | 18.197      | 14.247      | 1.485 | 0.047      | 0.122       |
| 11 | Rb <sub>2</sub> Co-11                 | 30.463      | 28.768      | 17.524      | 11.991      | 2.366 | 0.029      | 0.188       |
| 12 | (NH <sub>4</sub> ) <sub>2</sub> Zn-12 | 35.202      | 33.479      | 21.687      | 18.043      | 1.062 | 0.025      | 0.092       |
| 13 | (NH <sub>4</sub> ) <sub>2</sub> Mg-13 | 35.609      | 32.099      | 21.029      | 15.546      | 1.873 | 0.052      | 0.150       |
| 14 | (NH <sub>4</sub> ) <sub>2</sub> Ni-14 | 40.402      | 38.827      | 19.636      | 14.313      | 1.900 | 0.020      | 0.157       |
| 15 | (NH <sub>4</sub> ) <sub>2</sub> Co-15 | 39.440      | 37.271      | 20.179      | 15.083      | 1.748 | 0.028      | 0.145       |
| 16 | (NH <sub>4</sub> ) <sub>2</sub> Mn-16 | 37.456      | 33.262      | 21.336      | 16.106      | 1.750 | 0.059      | 0.140       |
| 17 | Tl <sub>2</sub> Zn-17                 | 28.890      | 24.715      | 16.951      | 12.405      | 2.001 | 0.078      | 0.155       |
| 18 | Tl <sub>2</sub> Ni-18                 | 30.243      | 25.590      | 16.127      | 9.322       | 3.832 | 0.083      | 0.267       |
| 19 | Tl <sub>2</sub> Mg-19                 | 28.878      | 24.539      | 17.337      | 12.524      | 2.098 | 0.081      | 0.161       |
| 20 | Tl <sub>2</sub> Mn-20                 | 30.043      | 26.081      | 18.215      | 13.513      | 1.892 | 0.071      | 0.148       |
| 21 | Tl <sub>2</sub> Co-21                 | 29.479      | 25.508      | 16.898      | 11.935      | 2.235 | 0.072      | 0.172       |

#### 4. The Supplementary Figures

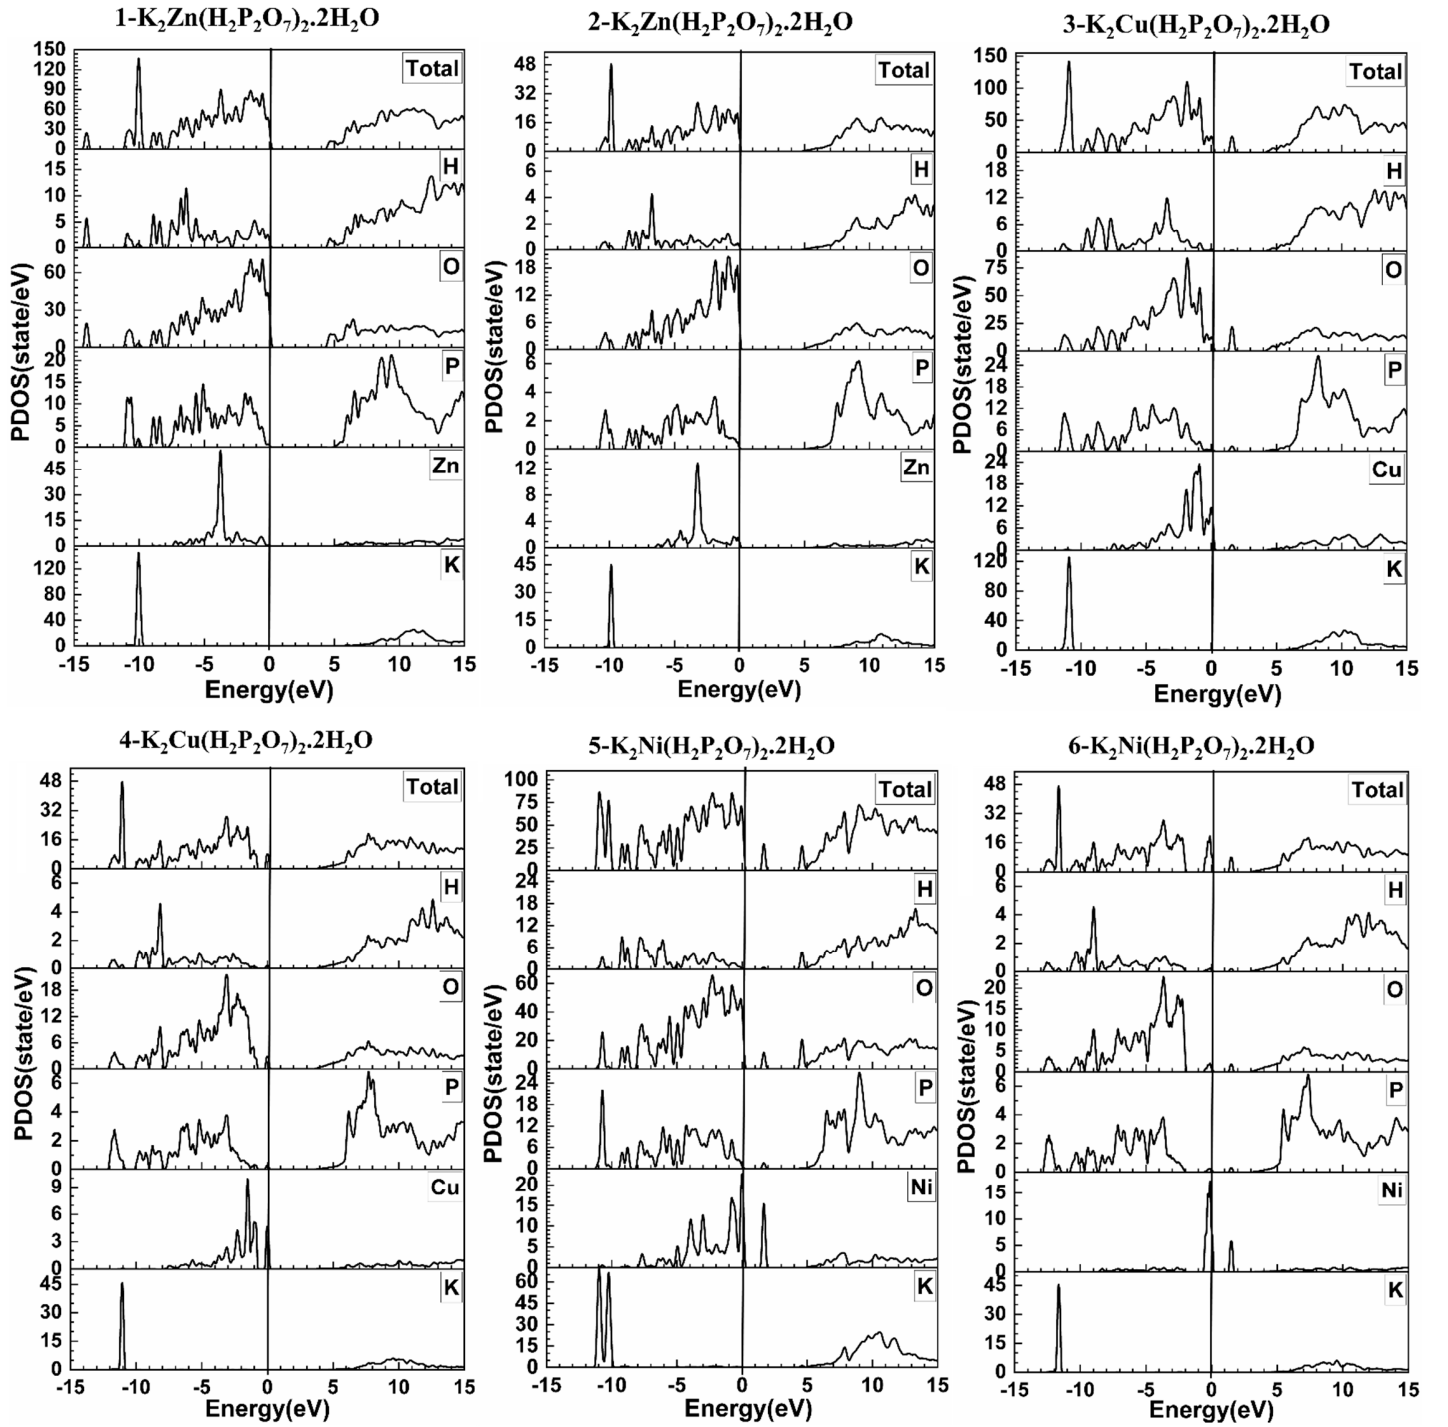

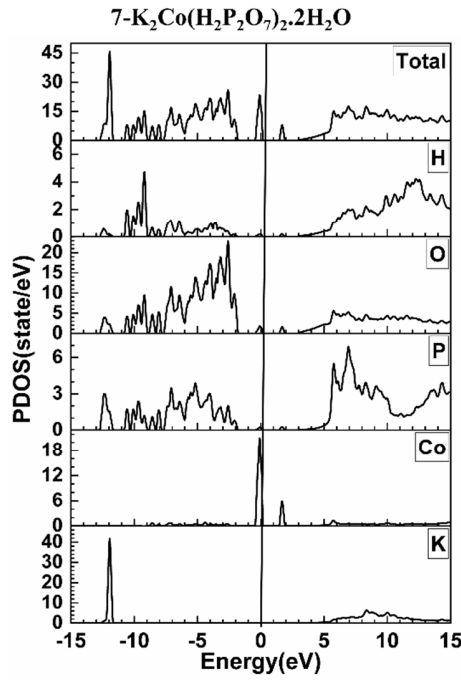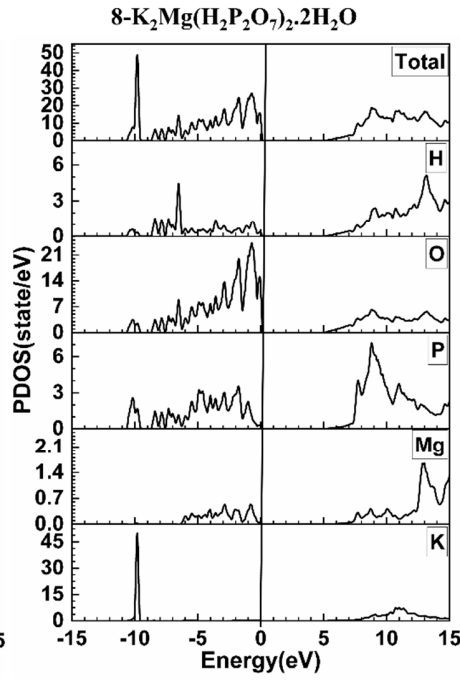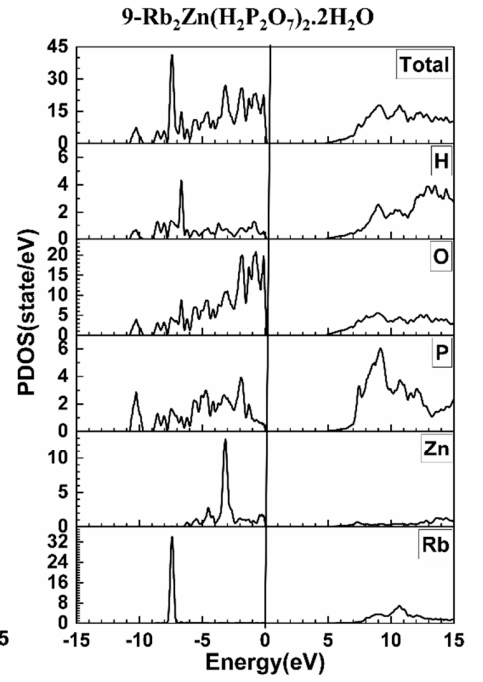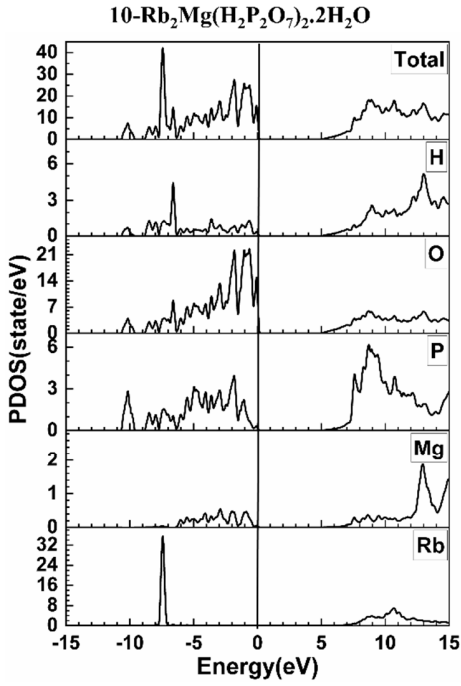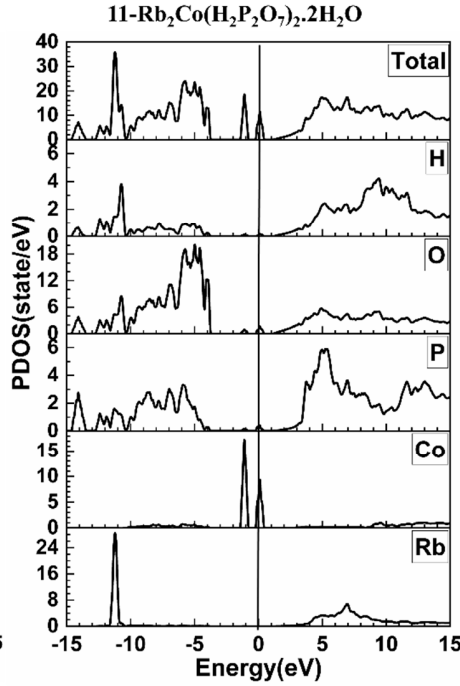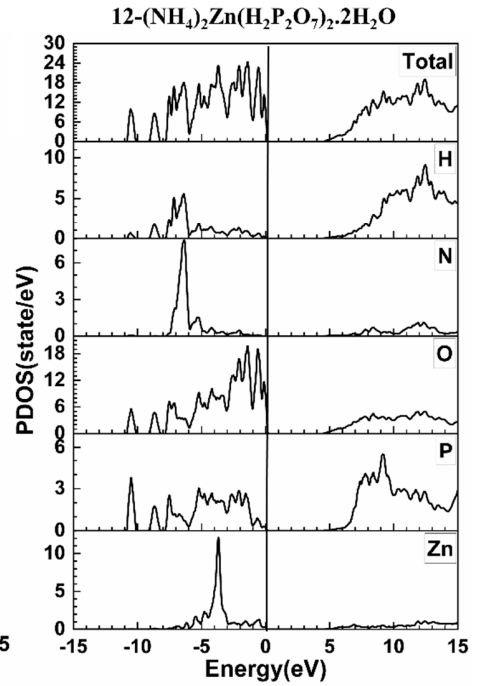

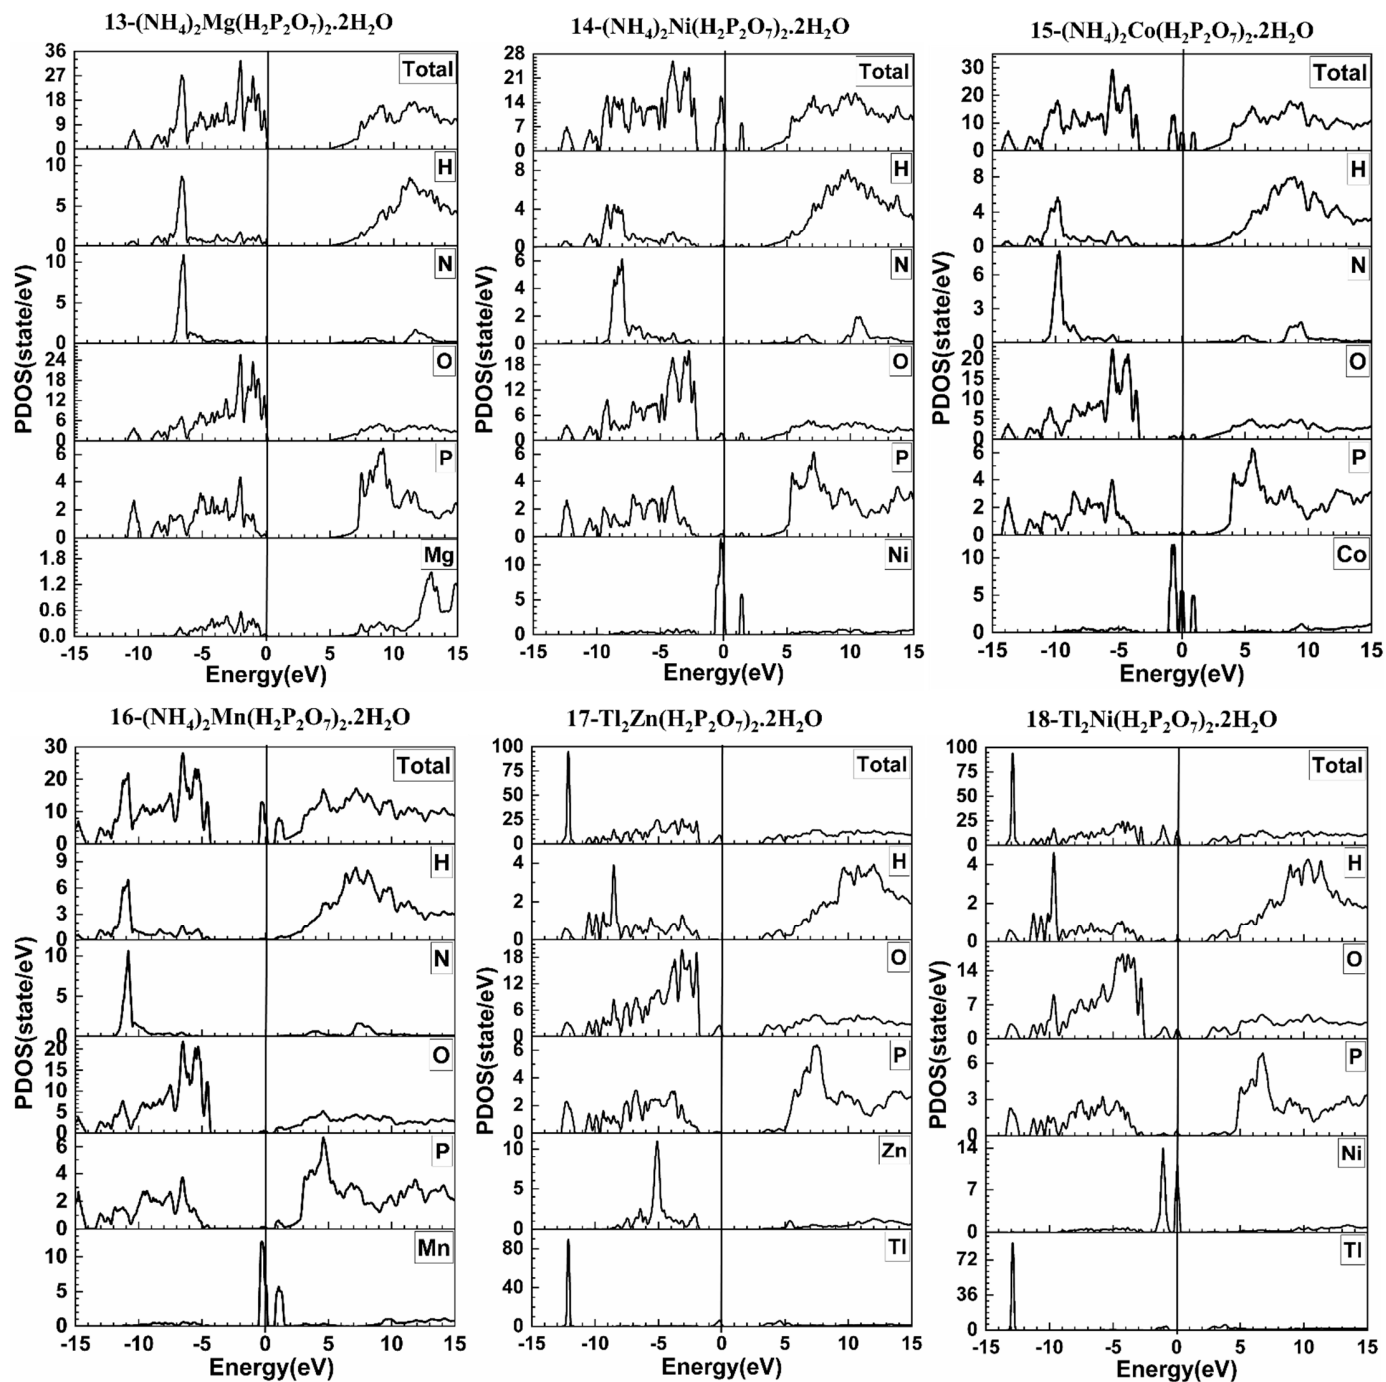

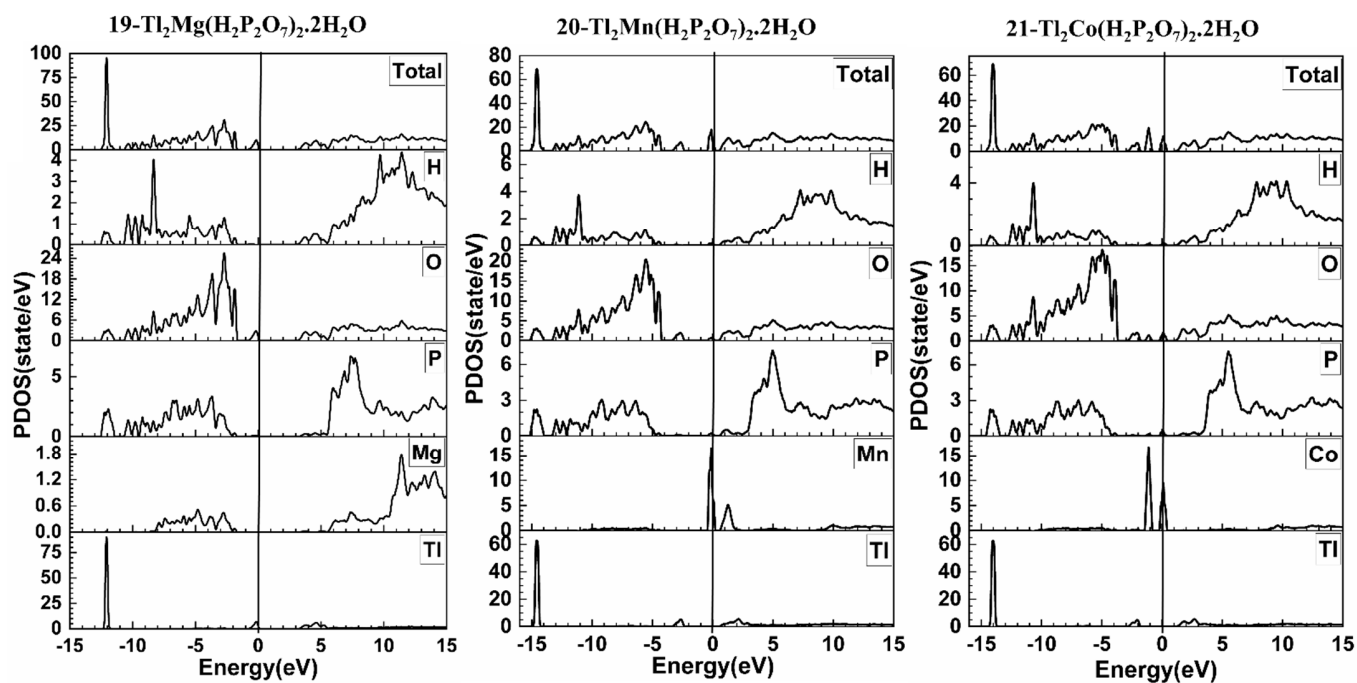

**Fig.S1** Calculated partial density of states (PDOS) for the 21 crystals.

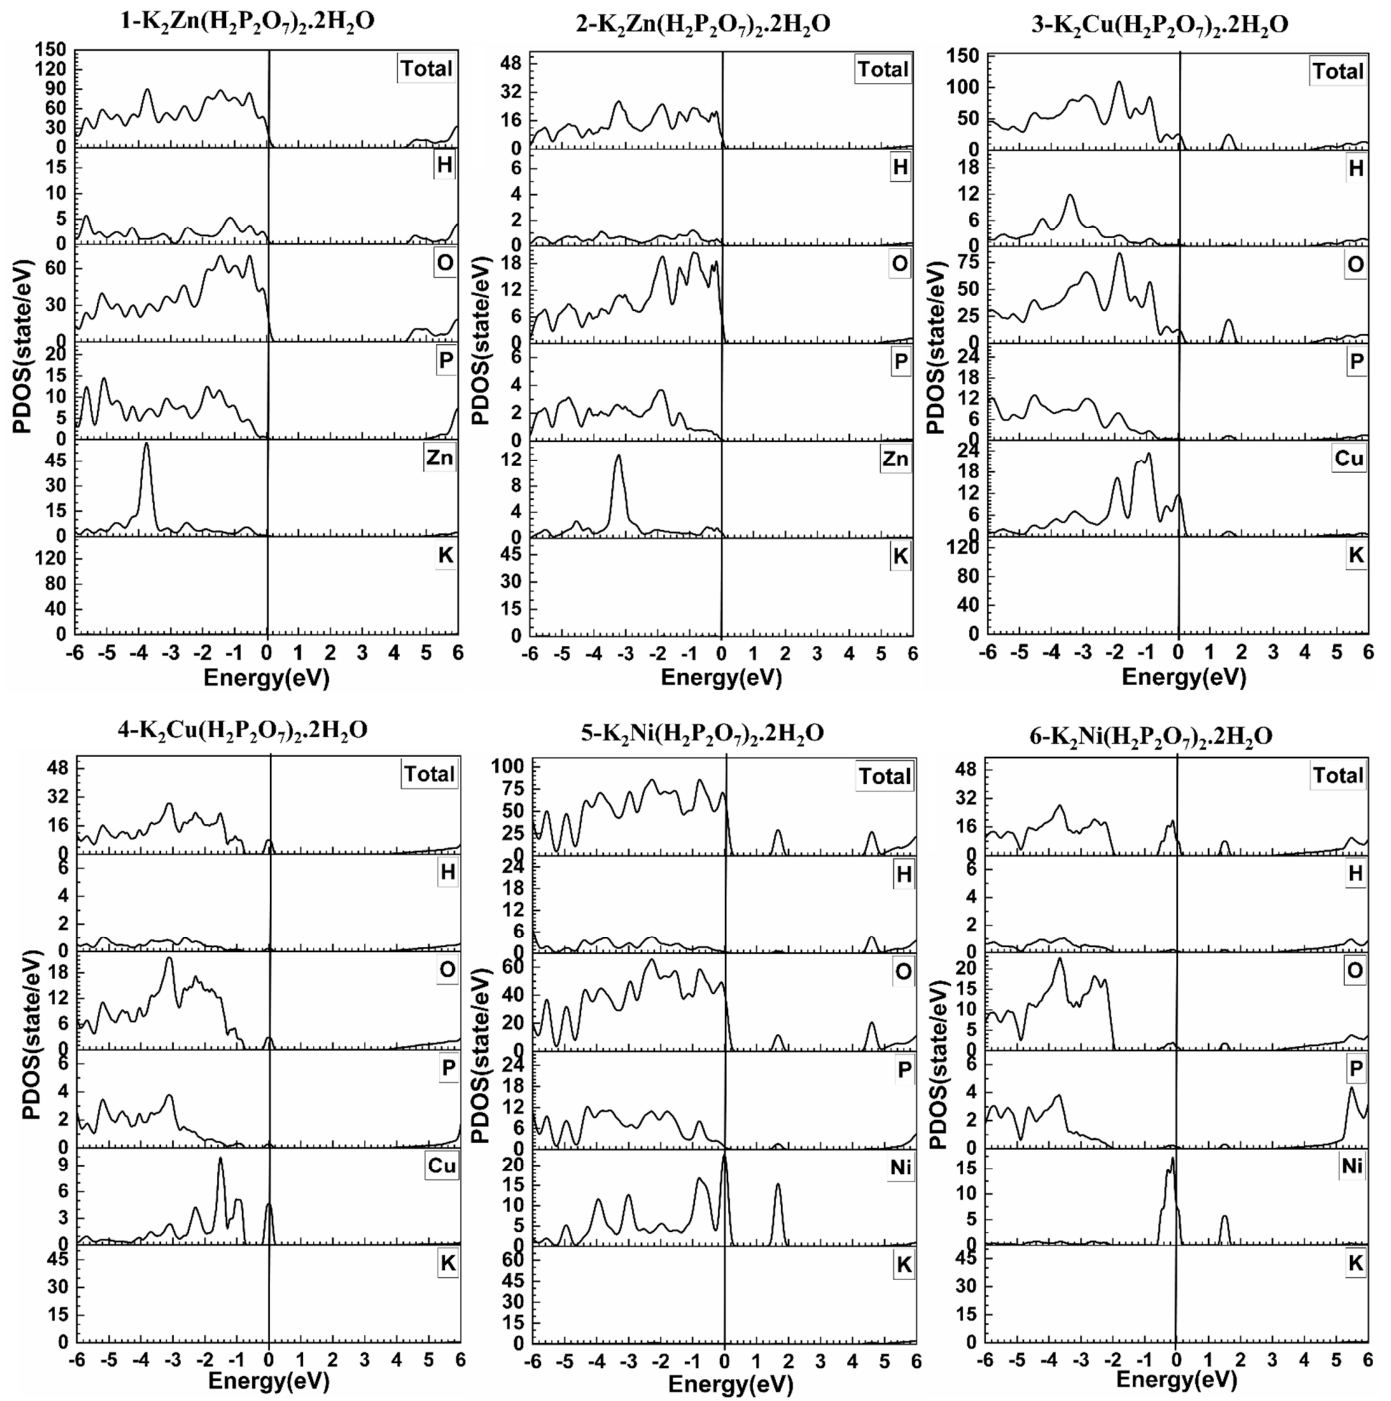

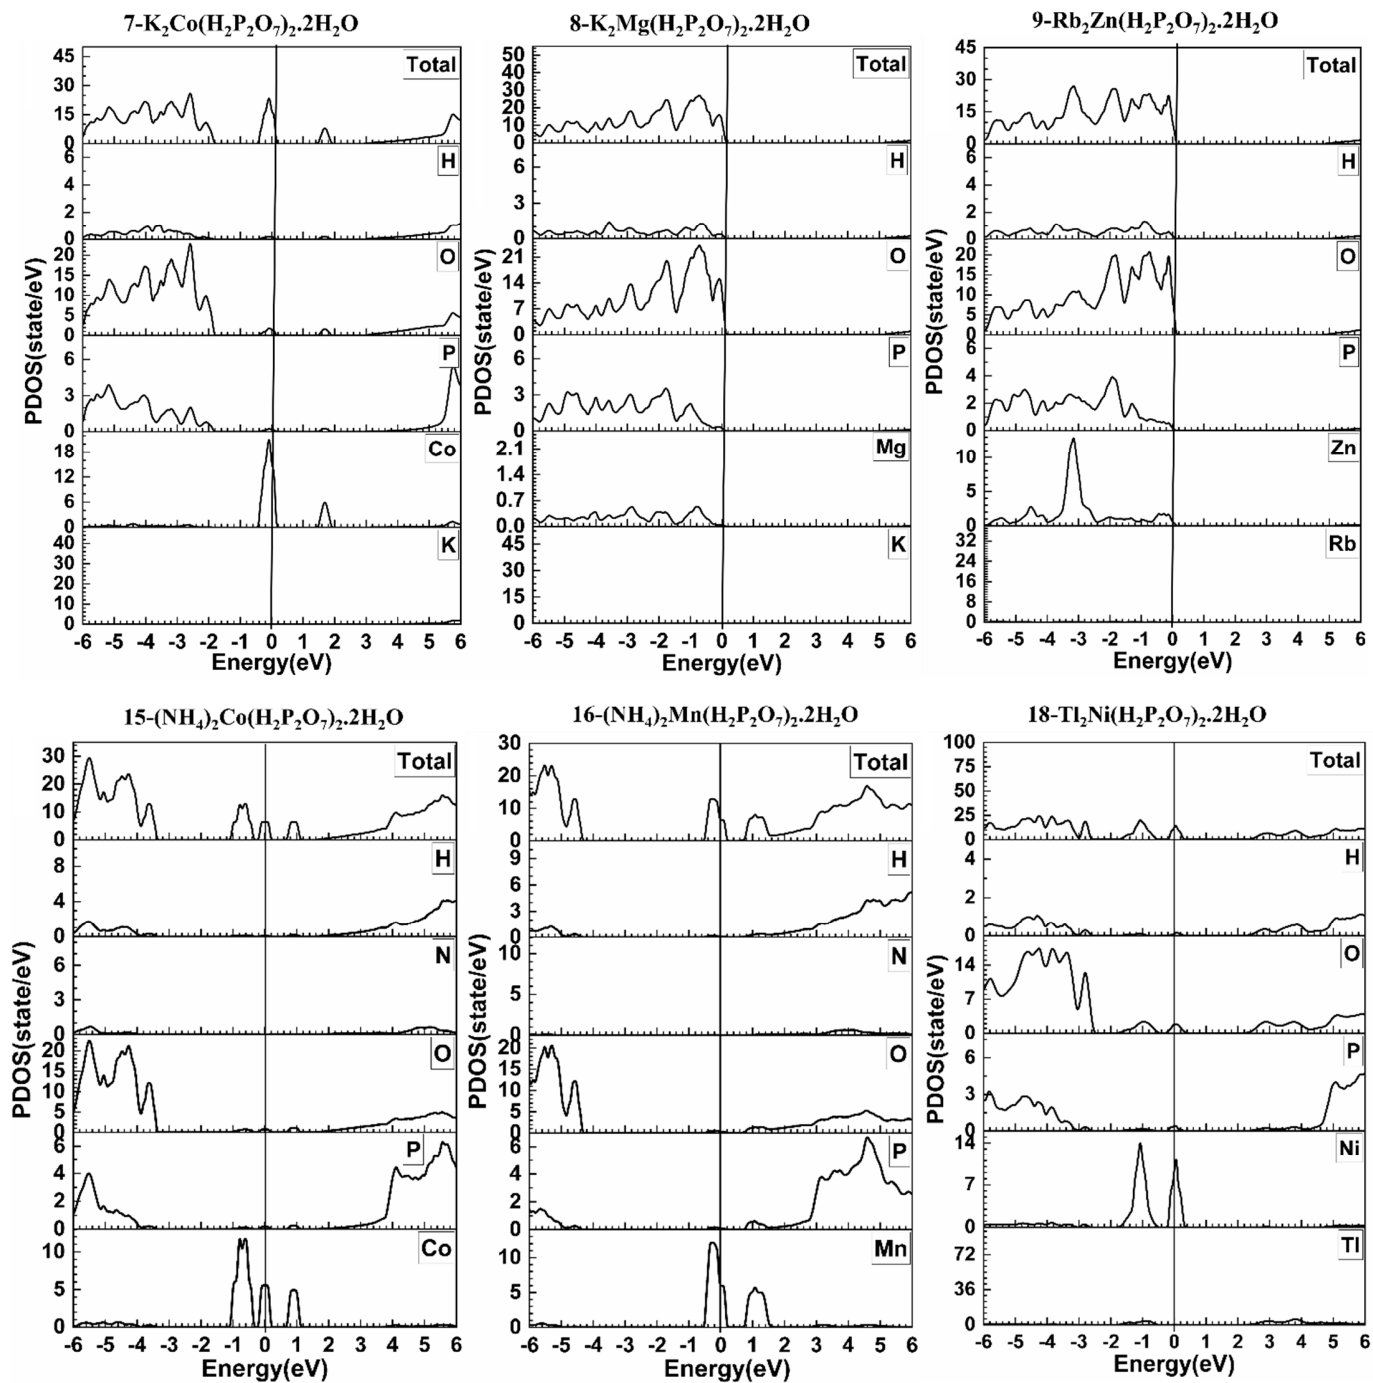

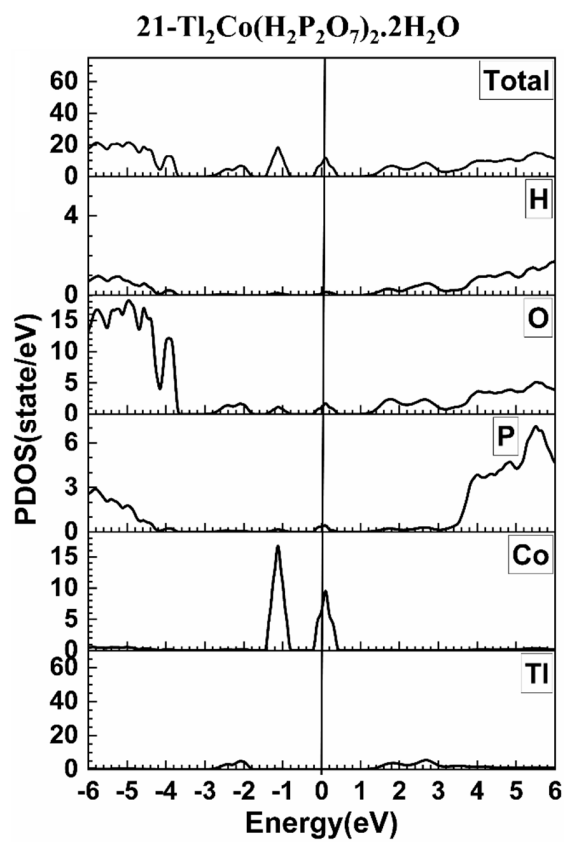

**Fig.S2** Calculated TDOS and PDOS of crystals from 1 to 9, and crystals: 15, 16, 18, and 21.



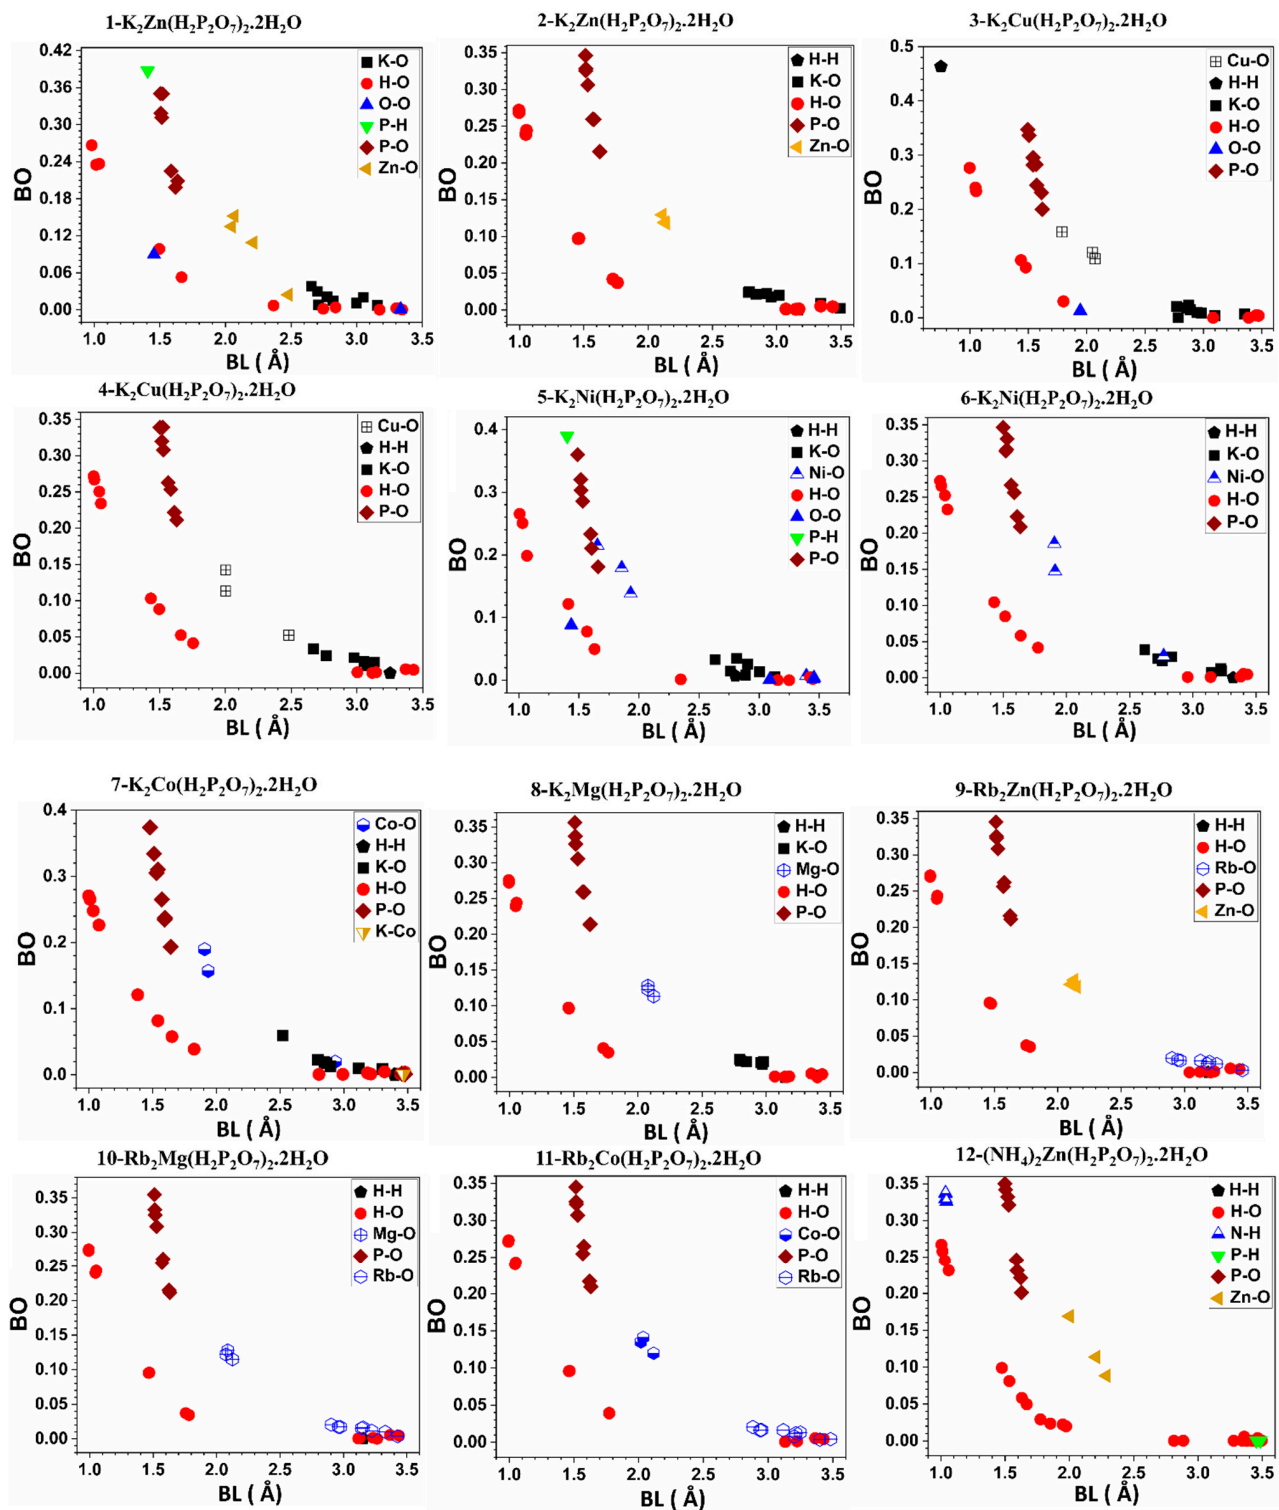

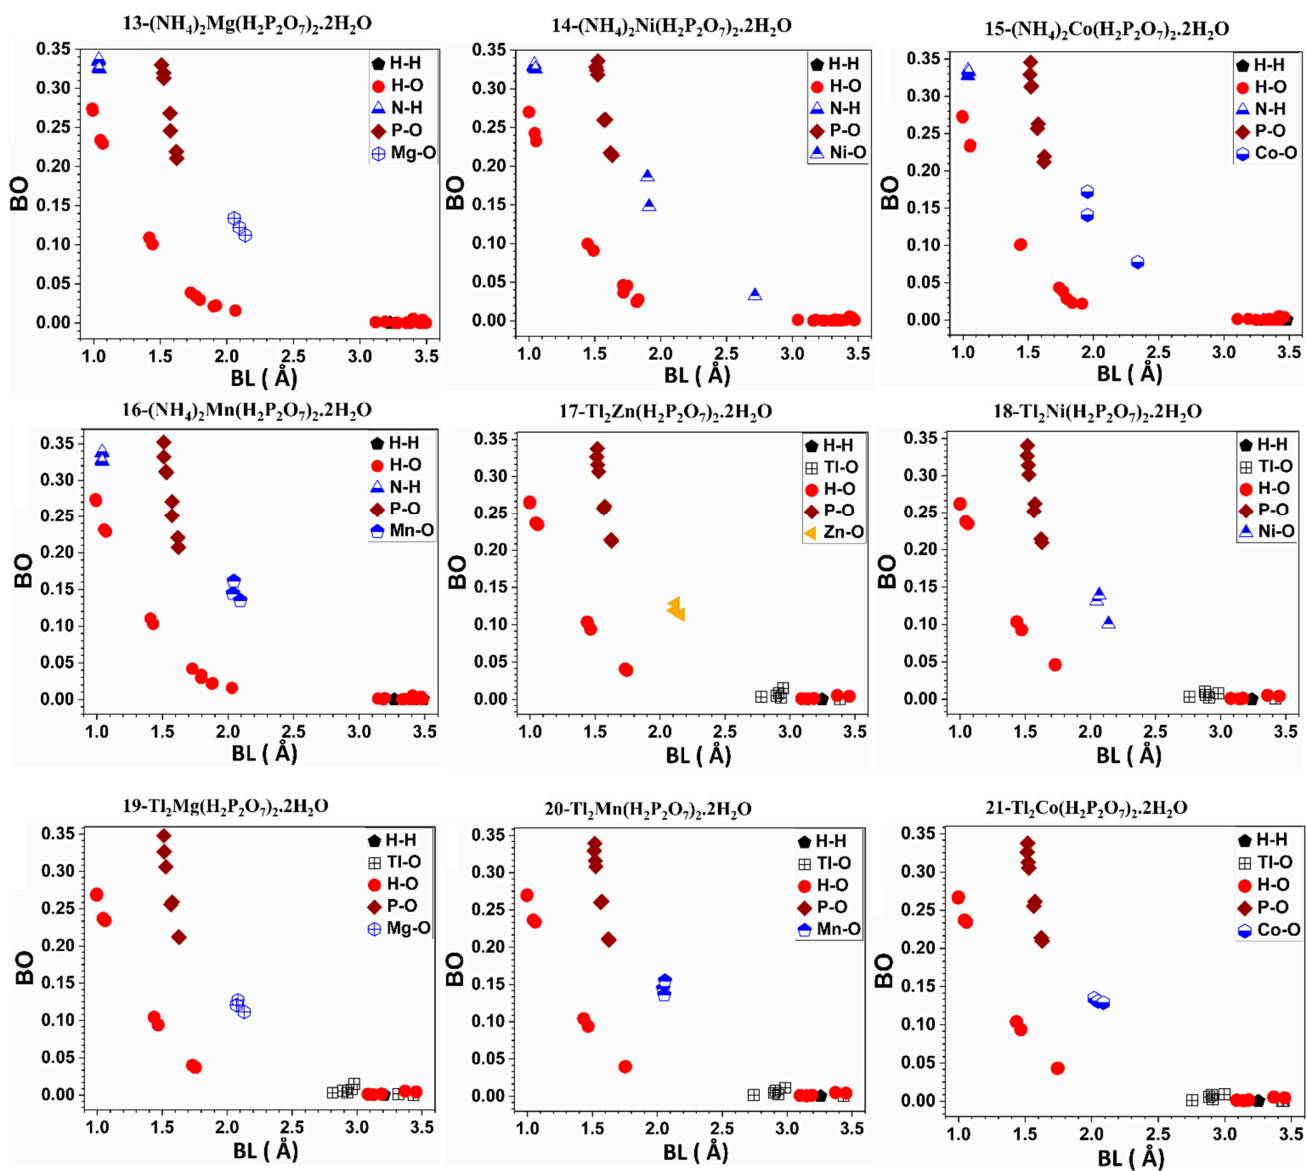

Fig.S3 Calculated BO vs BL for the 21 crystals.

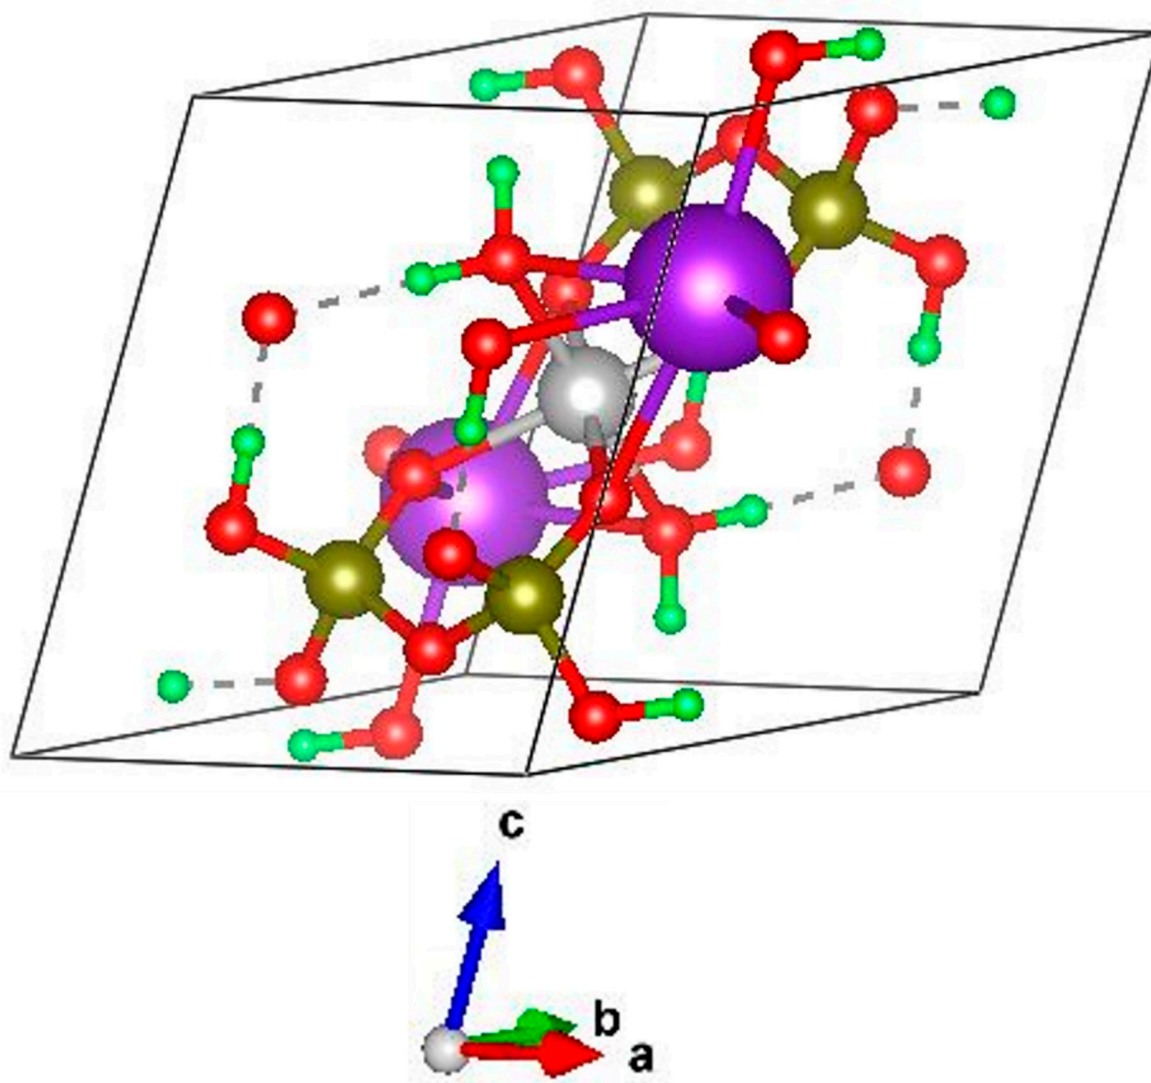

**Fig.S4.** Crystal structure of crystals 2 in ball and stick format. Crystal 2 with triclinic phase.

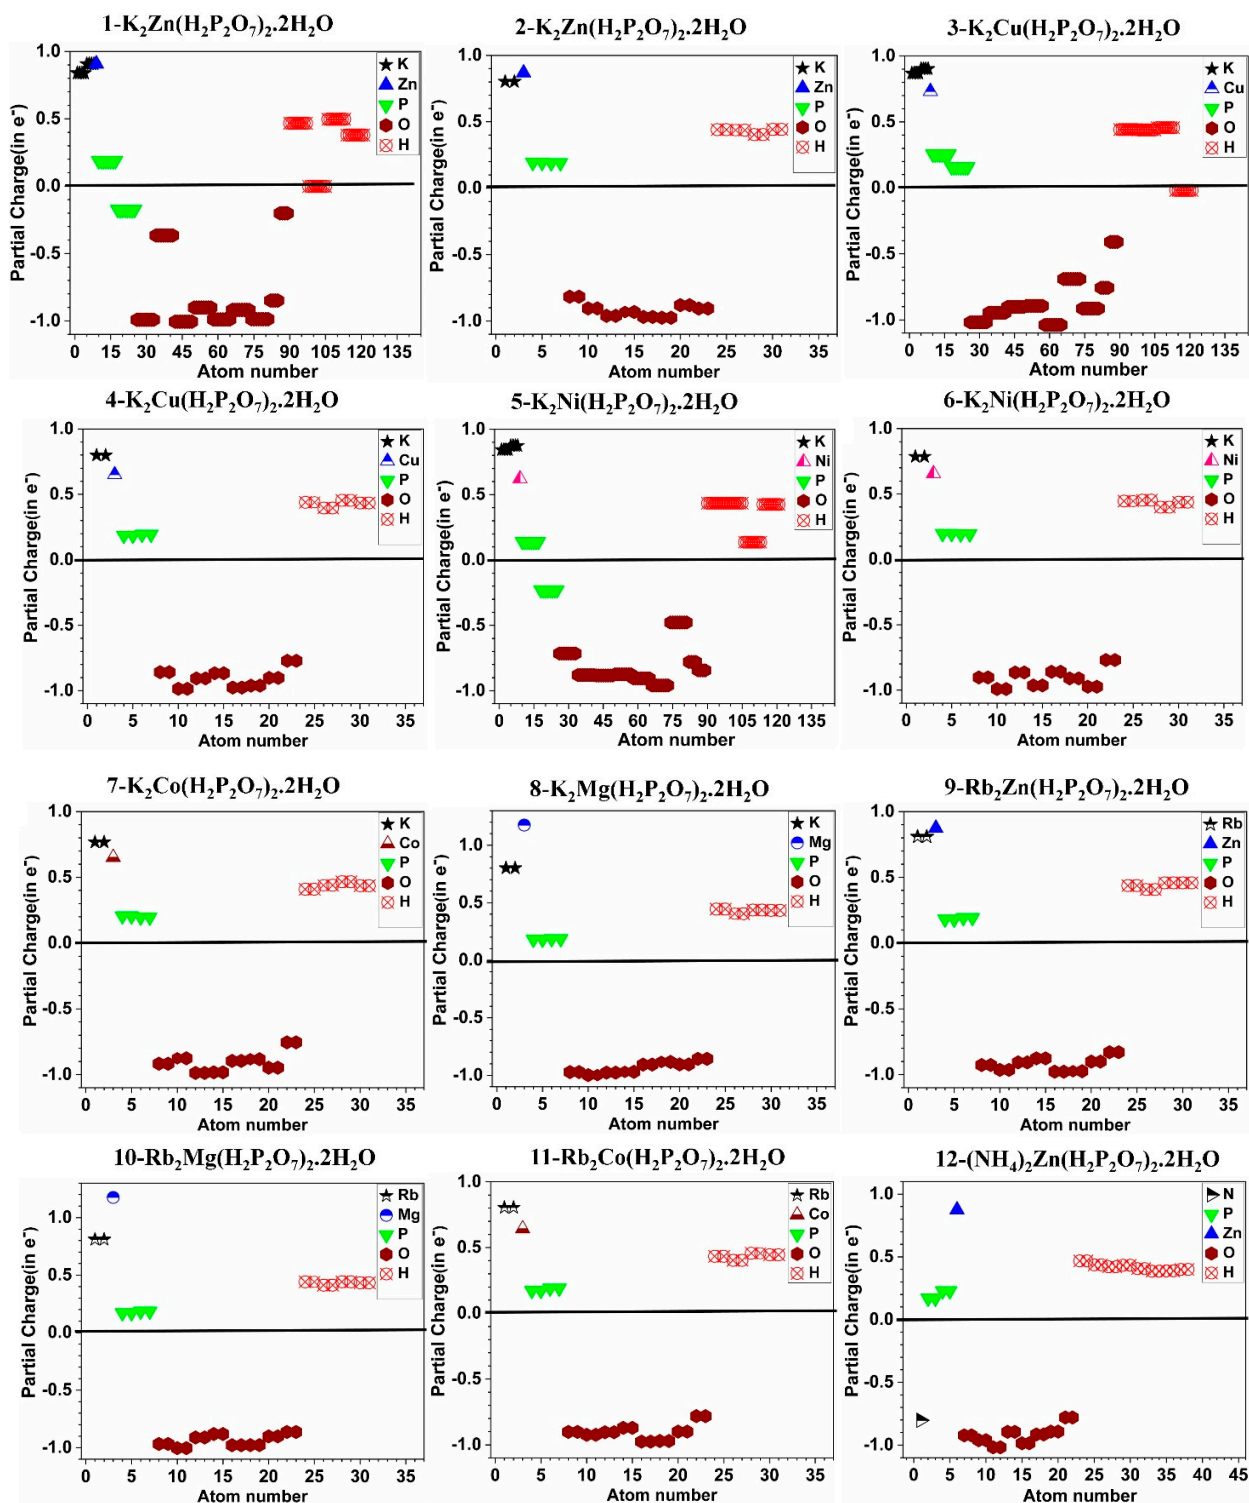

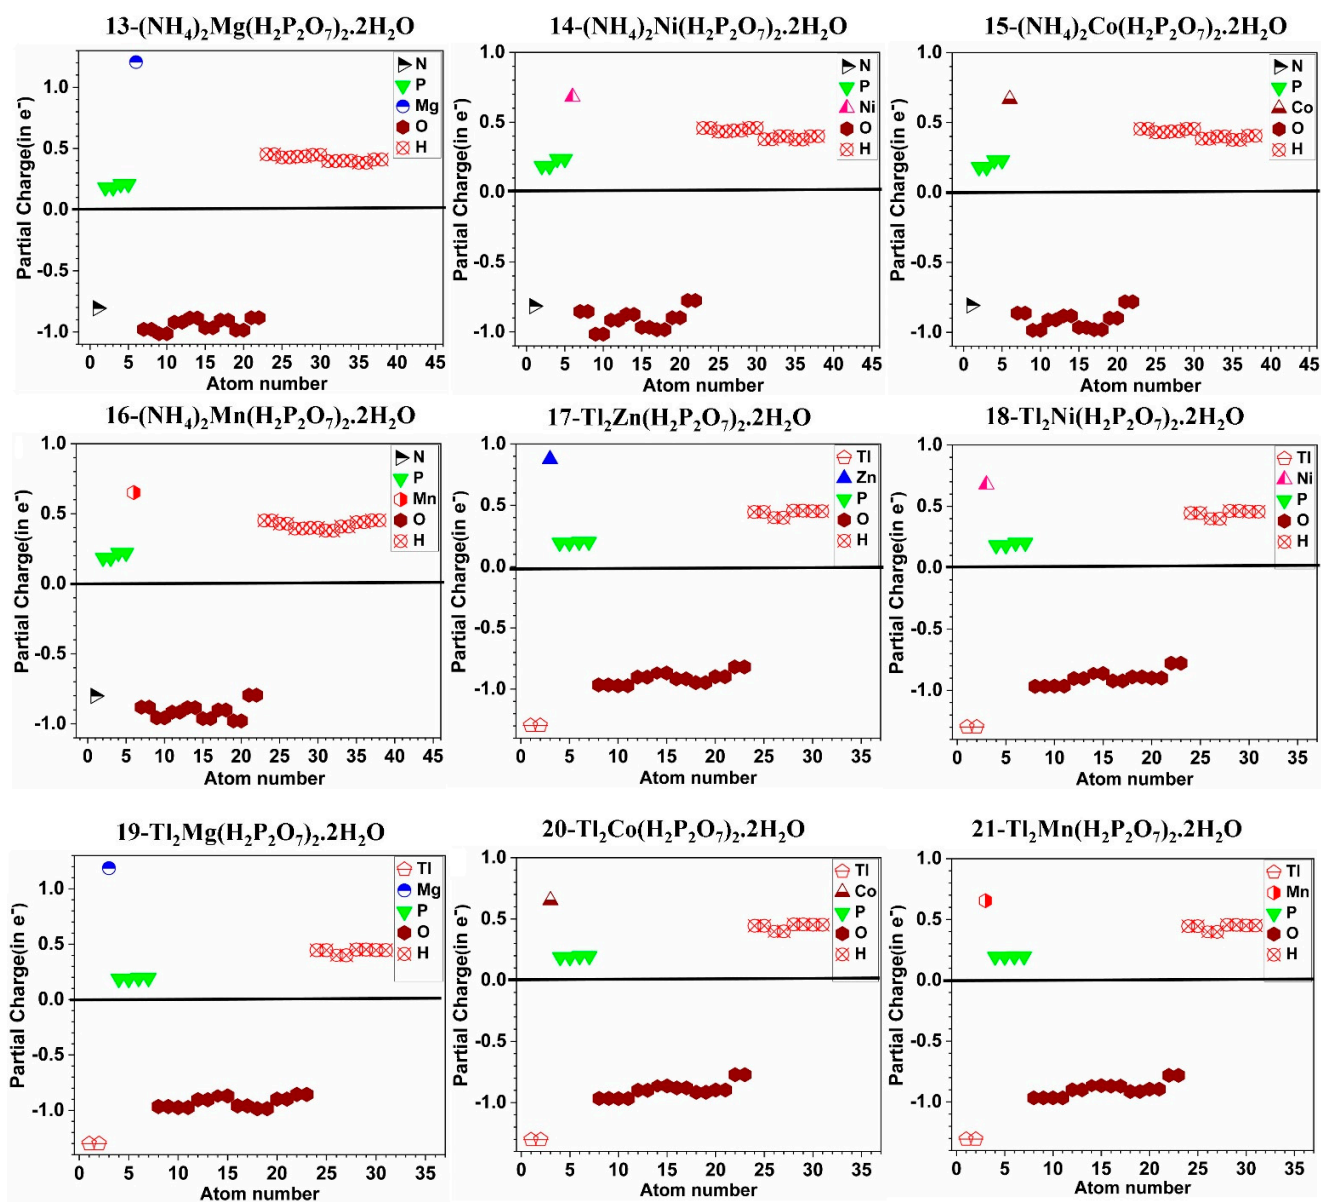

Fig.S5. Calculated partial charge distribution in the 21 pyrophosphate crystals.



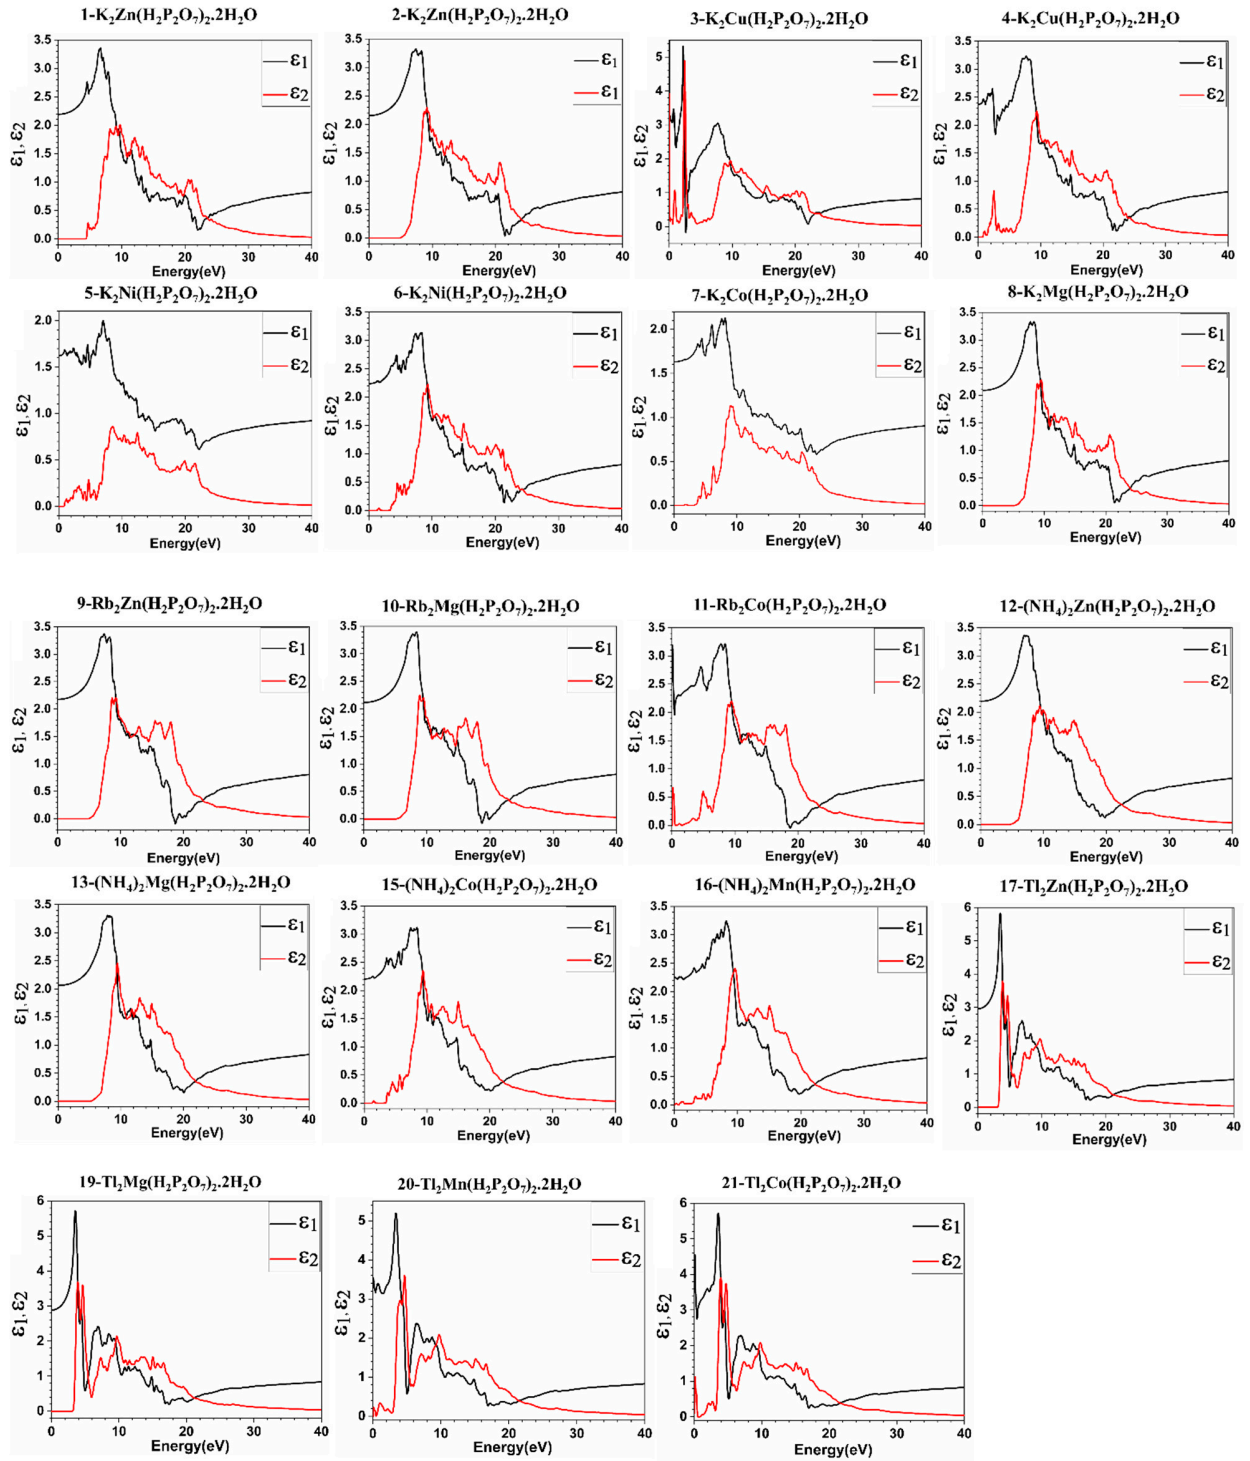

Fig.S6. Calculated optical dielectric functions for the 21 crystals.

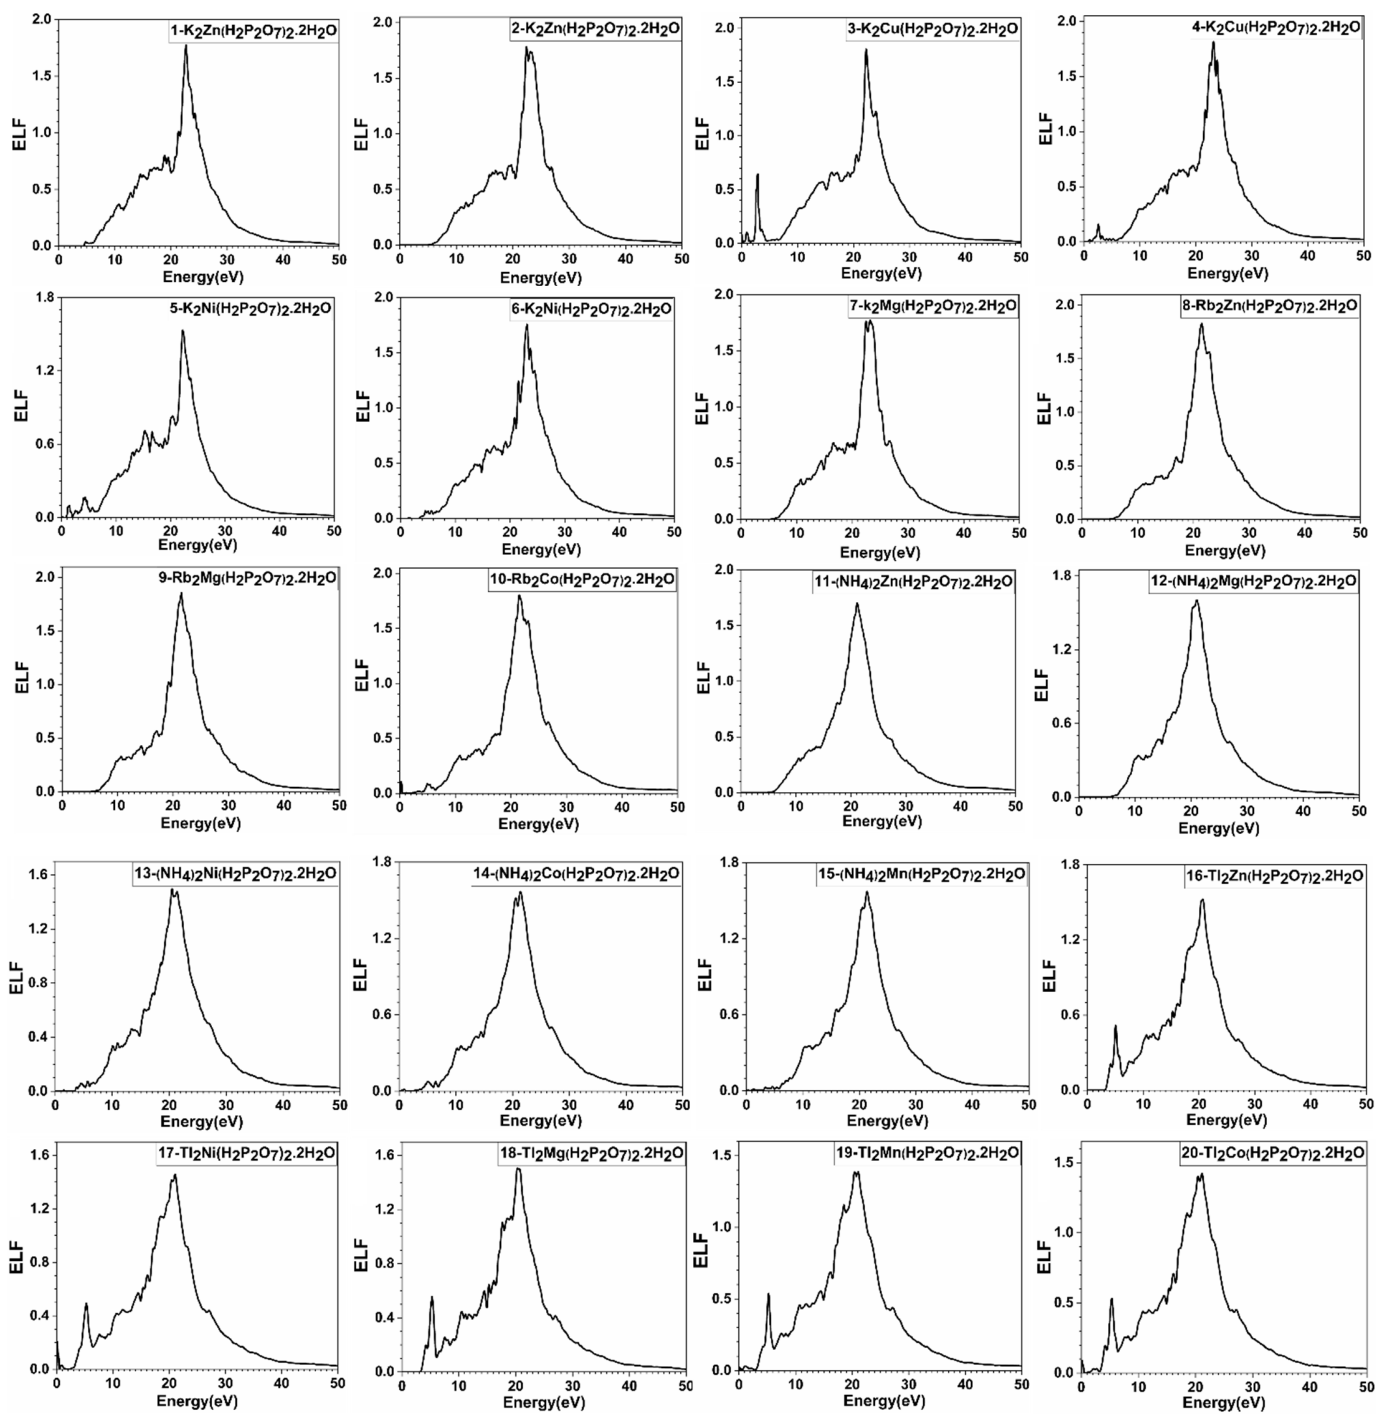

Fig.S7 Calculated energy loss function (ELF) for the 21 crystals.

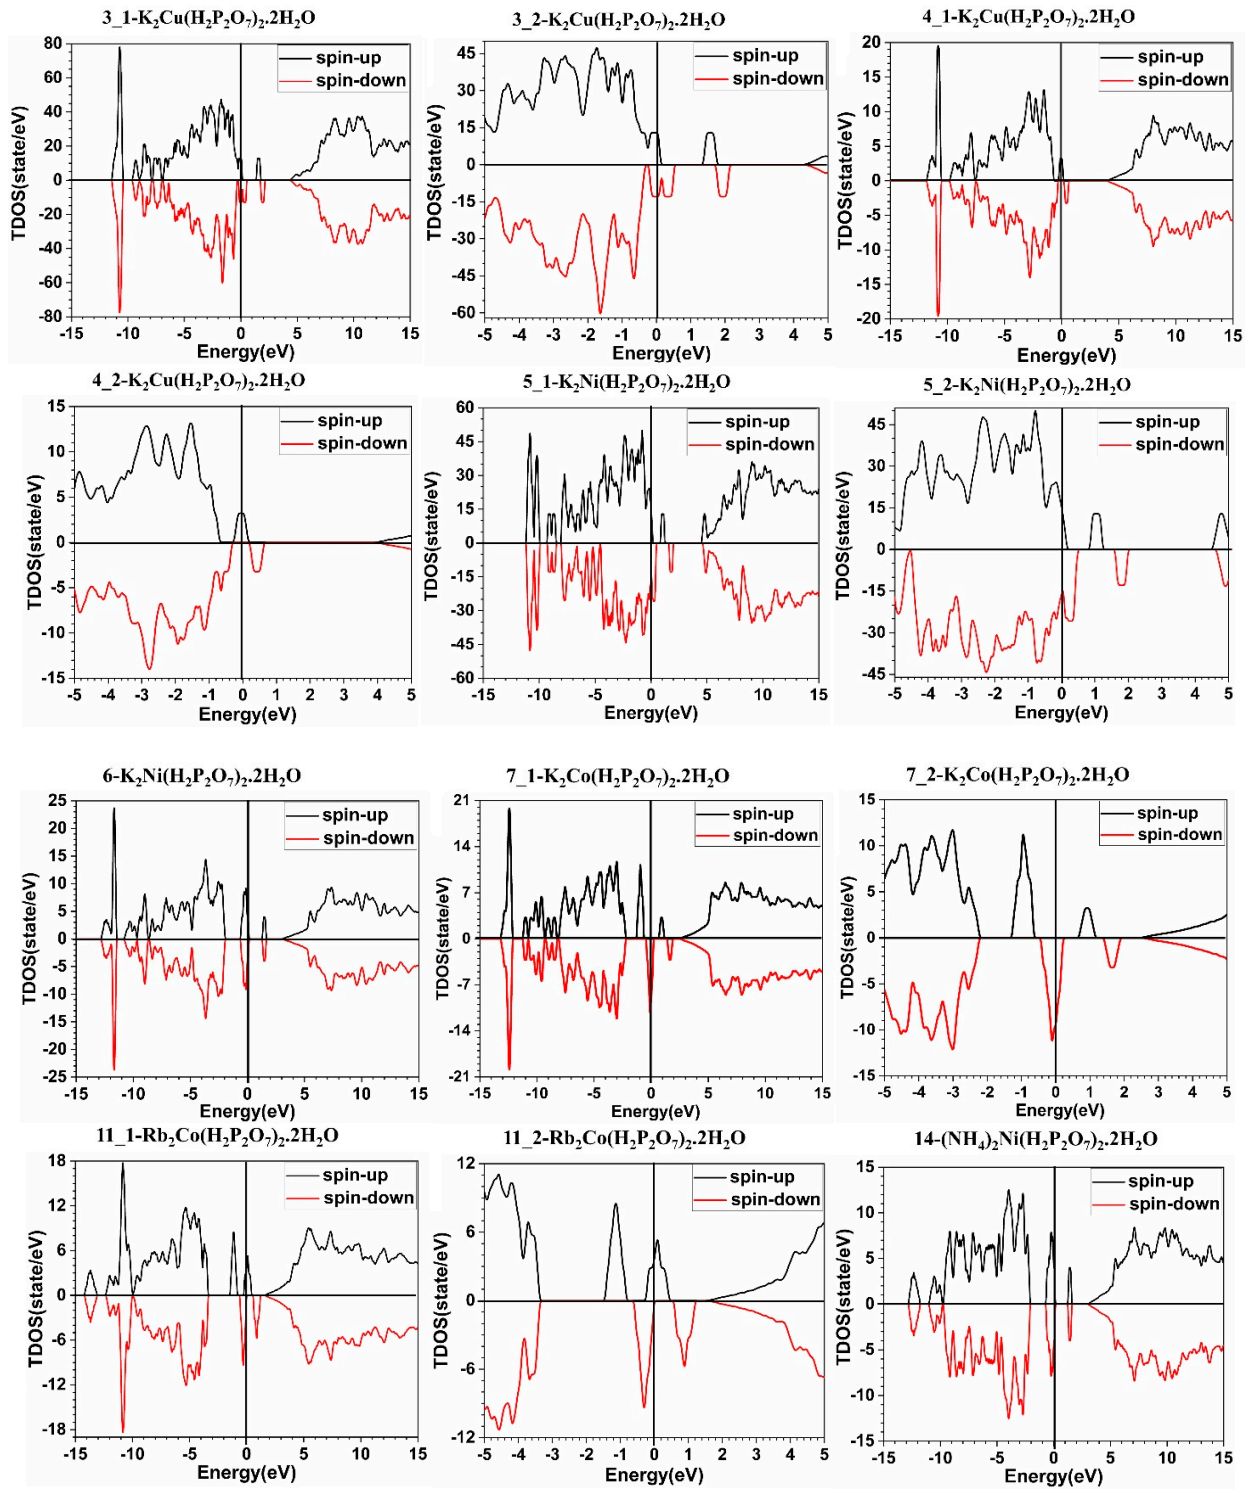



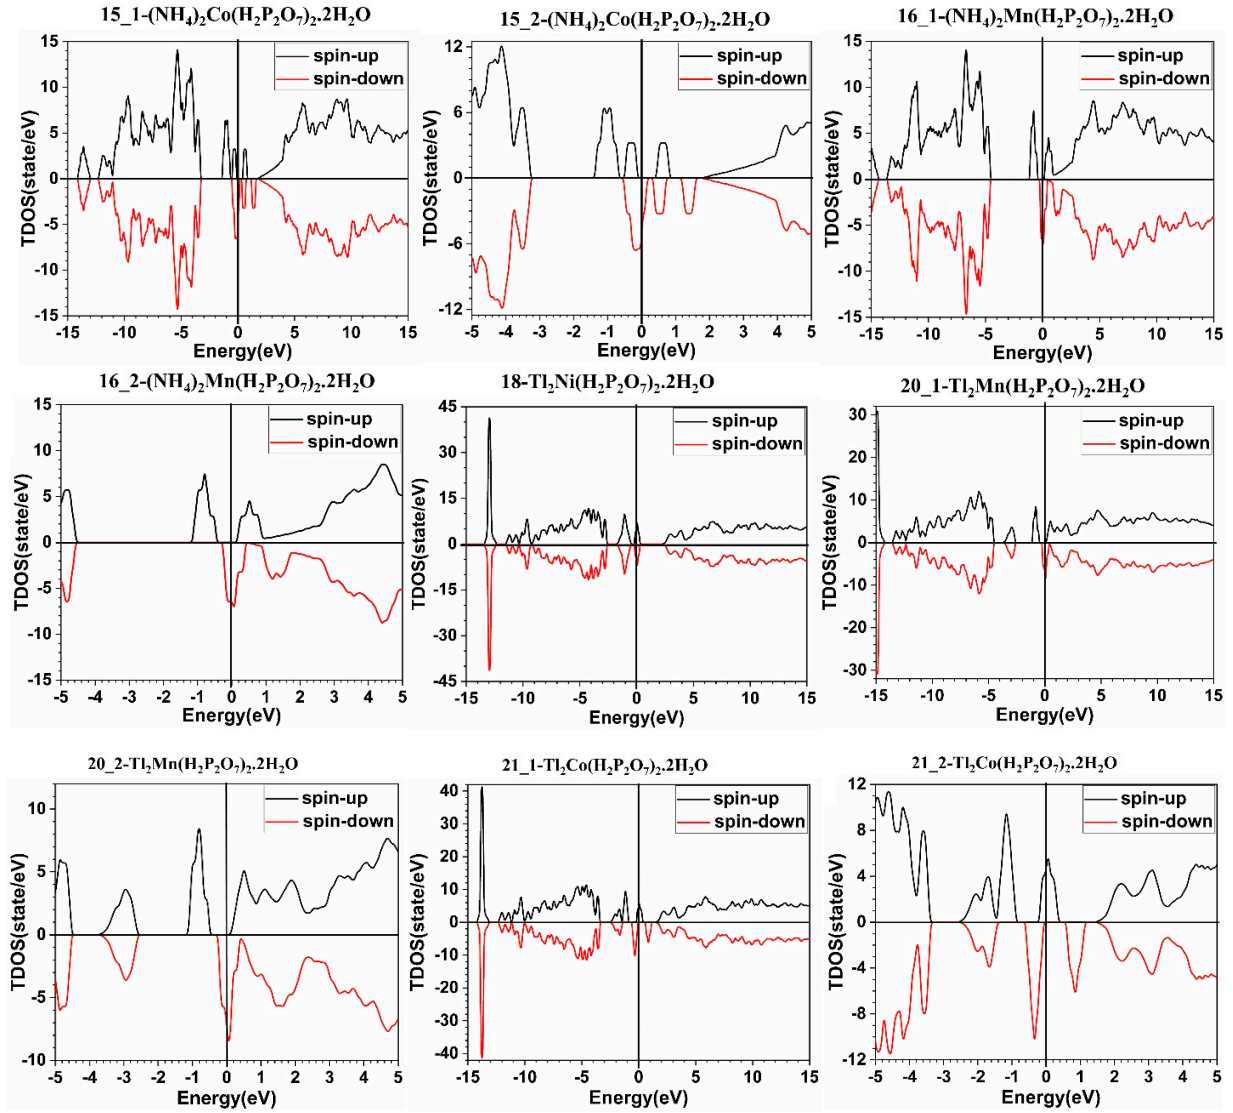

**Fig.S8.** Calculated TDOS with spin-polarized effect for the crystals 3, 4, 5, 6, 11, 14, 15, 16, 18, 20, and 21. The abbreviation #\_2 means that this figure belong to the same # crystal but in different range of energy. For example, 3\_1 and 3\_2 figures represent the same crystal.

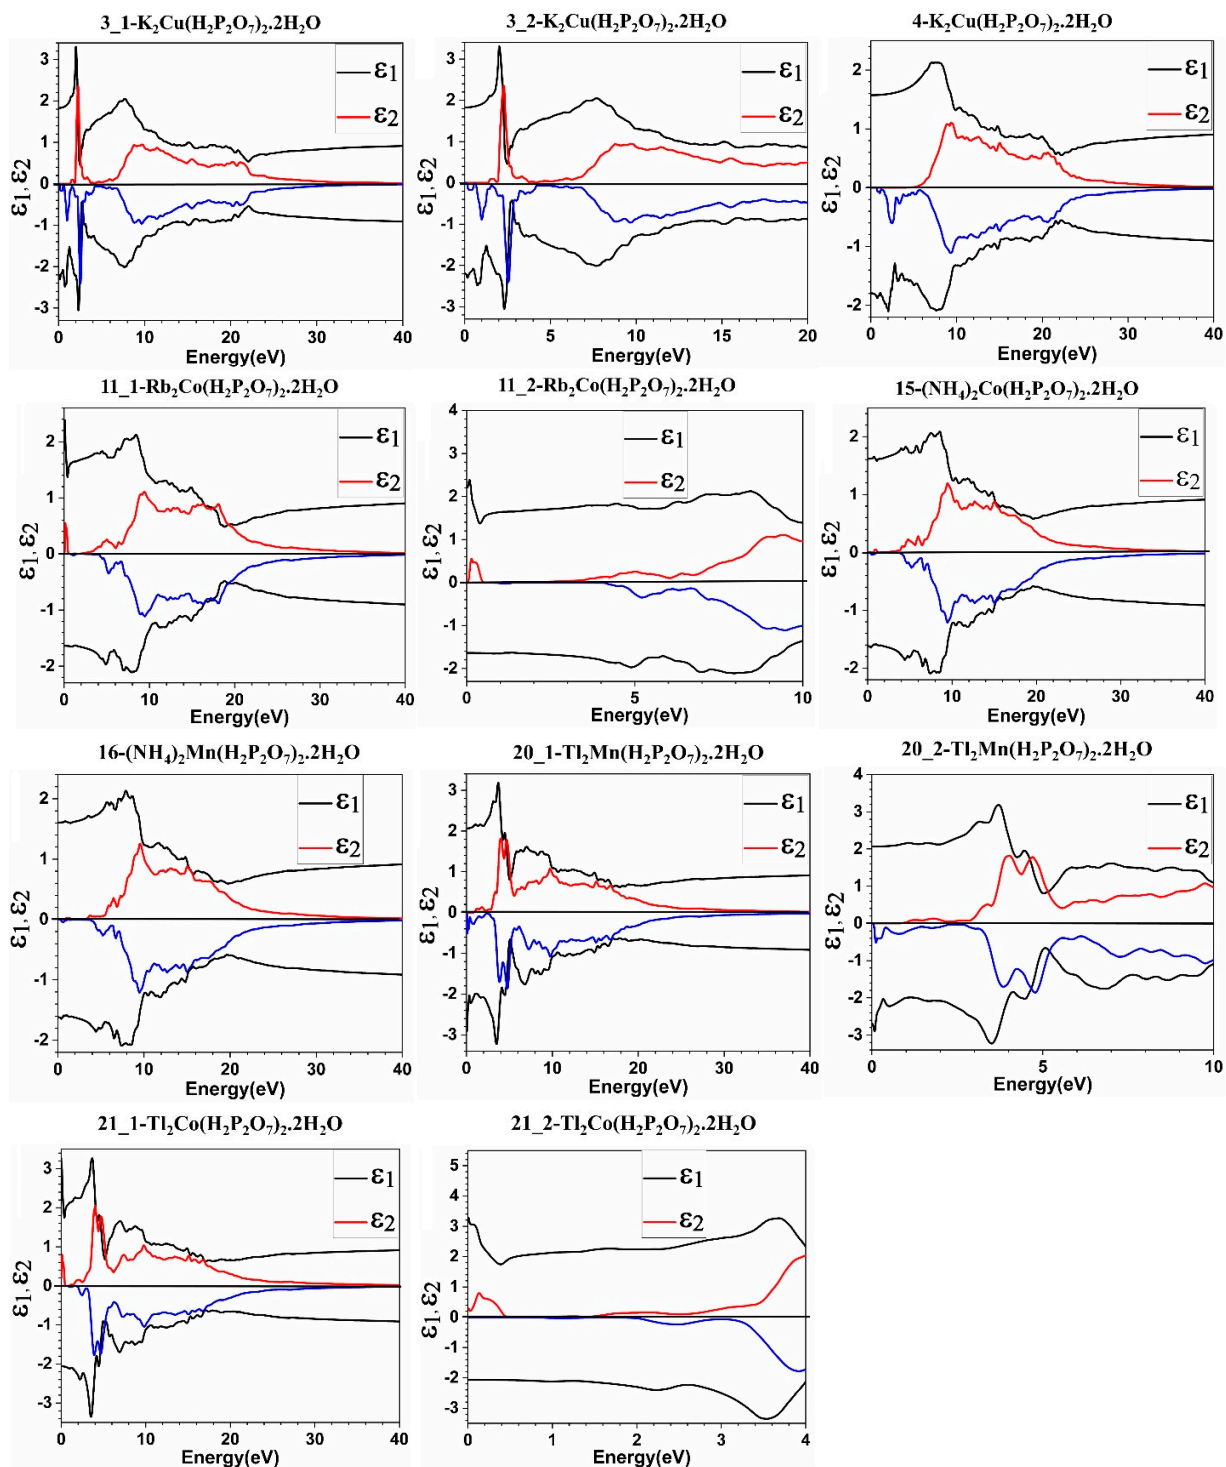

**Fig.S9** Calculated spin –up and spin-down refractive indices of crystals: 3, 4, 11, 15, 16, 20, and 21. The abbreviation #\_2 means that this figure belong to the same # crystal but in different range of energy. For example, 3\_1 and 3\_2 figures represent the same crystal.

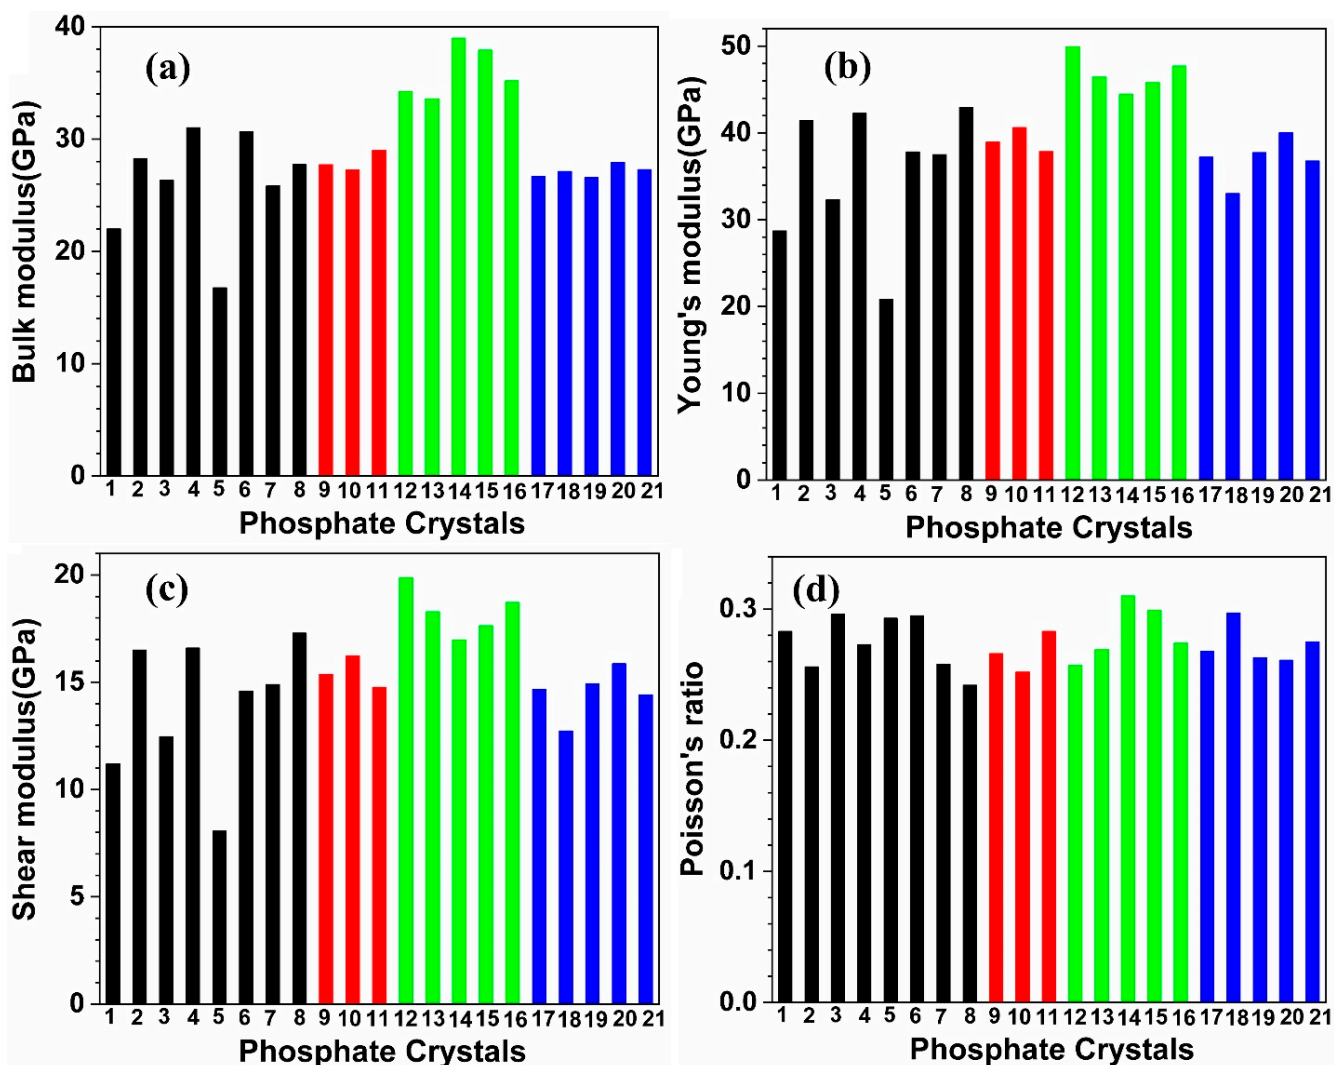

**Fig.S10 (a–d)** Distribution of bulk modulus (a), Young's modulus(b), shear modulus(c), and Poisson's ratio (d) for the 21 crystals. The black color is for the crystals from 1 to 8, red color is for crystals from 9 to 11, green color is for crystals from 12 to 16, and blue color is for crystals from 17 to 21.

## 5. References

- [1] Mo, Y.; Rulis, P.; Ching, W.Y. Electronic structure and optical conductivities of 20 MAX-phase compounds. *Phys. Rev. B* **2012**, *86*, <https://doi.org/10.1103/physrevb.86.165122>.
- [2] Yao, H.; Ouyang, L.; Ching, W.-Y. Ab Initio Calculation of Elastic Constants of Ceramic Crystals. *J. Am. Ceram. Soc.* **2007**, *90*, 3194–3204, <https://doi.org/10.1111/j.1551-2916.2007.01931.x>.
- [3] Reuss, A. Berechnung der Fließgrenze von Mischkristallen auf Grund der Plastizitätsbedingung für Einkristalle .. **1929**, *9*, 49–58, <https://doi.org/10.1002/zamm.19290090104>.
- [4] Hill, R. The Elastic Behaviour of a Crystalline Aggregate. *Proc. Phys. Soc. Sect. A* **1952**, *65*, 349, [doi:10.1088/0370-1298/65/5/307](https://doi.org/10.1088/0370-1298/65/5/307).
